# Supplementary material
Source: PubMed Central journal article supplement (PMC4178894)
Supplement: JVI.01457-14_zjv999099495so1.pdf [file JVI.01457-14_zjv999099495so1.pdf]

1 **FIGURE LEGENDS - SUPPLEMENTARY MATERIAL**

2 **Fig. S1. RNA CoMPASS analysis of c666-1.**

3 **Fig. S2. RNA CoMPASS analysis of x666-1.**

4 **Fig. S3. RNA CoMPASS analysis of CNE1.**

5 **Fig. S4. RNA CoMPASS analysis of HONE1.** The presence of mycoplasma reads  
6 likely represents true contamination.

7 **Fig. S5. RNA CoMPASS analysis of HK1.**

8 **Fig. S6. RNA CoMPASS analysis of NP460.**

9

10 **Fig. S7. MuLV detected in c666-1, x666-1, and NP460 cell lines.**

11 **Fig. S8. HPV-18 detected in three independent sources of CNE1 cell lines.**

12 Quantitative real-time PCR on CNE1 cells from three independent laboratories were  
13 surveyed for the presence of HPV-16 and HPV-18. All three cell lines demonstrated  
14 evidence of HPV-18 but none was infected with HPV-16. Samples were normalized to  
15 GAPDH and compared to NPC cell line c666-1 for relative viral expression.

16

17 **Fig. S9. RNA CoMPASS analysis of CNE1-JPN.** The presence of mycoplasma reads  
18 likely represents true contamination.

19

20 **Fig. S10. Strand specific RNA-sequencing of ribodepleted RNA from CNE1, CNE1-**  
21 **JPN, and HONE1 cell lines reveals the majority of transcription in the sense**  
22 **direction.** Coverage graphs are represented using a linear scale. Green coverage  
23 represents reads in both the sense and antisense strands, blue coverage represents

24 those reads in the sense direction, and pink coverage represents those reads in the  
25 antisense direction. The y-axis represents the number of reads at each nucleotide  
26 position of the genome. Insets within the antisense coverage represent blowups of  
27 those regions with a max scale of minus 15 reads since there were so few reads. The  
28 max scale for the other coverage graphs is 1,750 reads.

29

30 **Fig. S11. HPV-18 breakpoint 1-a.** Homology: sequence that shares homology with  
31 both human and HPV-18 sequence.

32 **Fig. S12. HPV-18 breakpoint 2-c.**

33 **Fig. S13. HPV-18 breakpoint 3-d.** Homology: sequence that shares homology with  
34 both human and HPV-18 sequence.

35 **Fig. S14. HPV-18 breakpoint 4-e.** Homology: sequence that shares homology with  
36 both human and HPV-18 sequence.

37 **Fig. S15. HPV-18 breakpoint 5-b.** No homology: sequence that shares no homology  
38 with human or HPV-18 sequence.

39

40 **Fig. S16. HPV-18 SNV analysis shows identical SNVs in HeLa cells, CNE1, and**  
41 **HONE1 cells.** Raw reads from HeLa, CNE1, and HONE1 datasets aligned to the HPV-  
42 18 genome (NC001357) were visualized in the IGV genome browser. Coverage graphs  
43 are represented using a log scale. The y-axis represents the number of reads at each  
44 nucleotide position. Blowouts of all mismatches observed in the samples are shown in  
45 individual boxes. The nucleotide mutation coordinates and corresponding amino acid  
46 changes are represented above each respective box.

47 **Fig. S17. Specific SNVs within CNE1 and HONE1 exhibit heterogeneity relative to**  
48 **HeLa cells.**

49

50 **Table S1. List of PCR primers.**

51 **Table S2. List of human viruses used in custom viral genome.**

52 **Table S3. Quantification of HPV-18 genes in NPC cell lines.**

Fig. S1. RNA CoMPASS analysis of c666-1

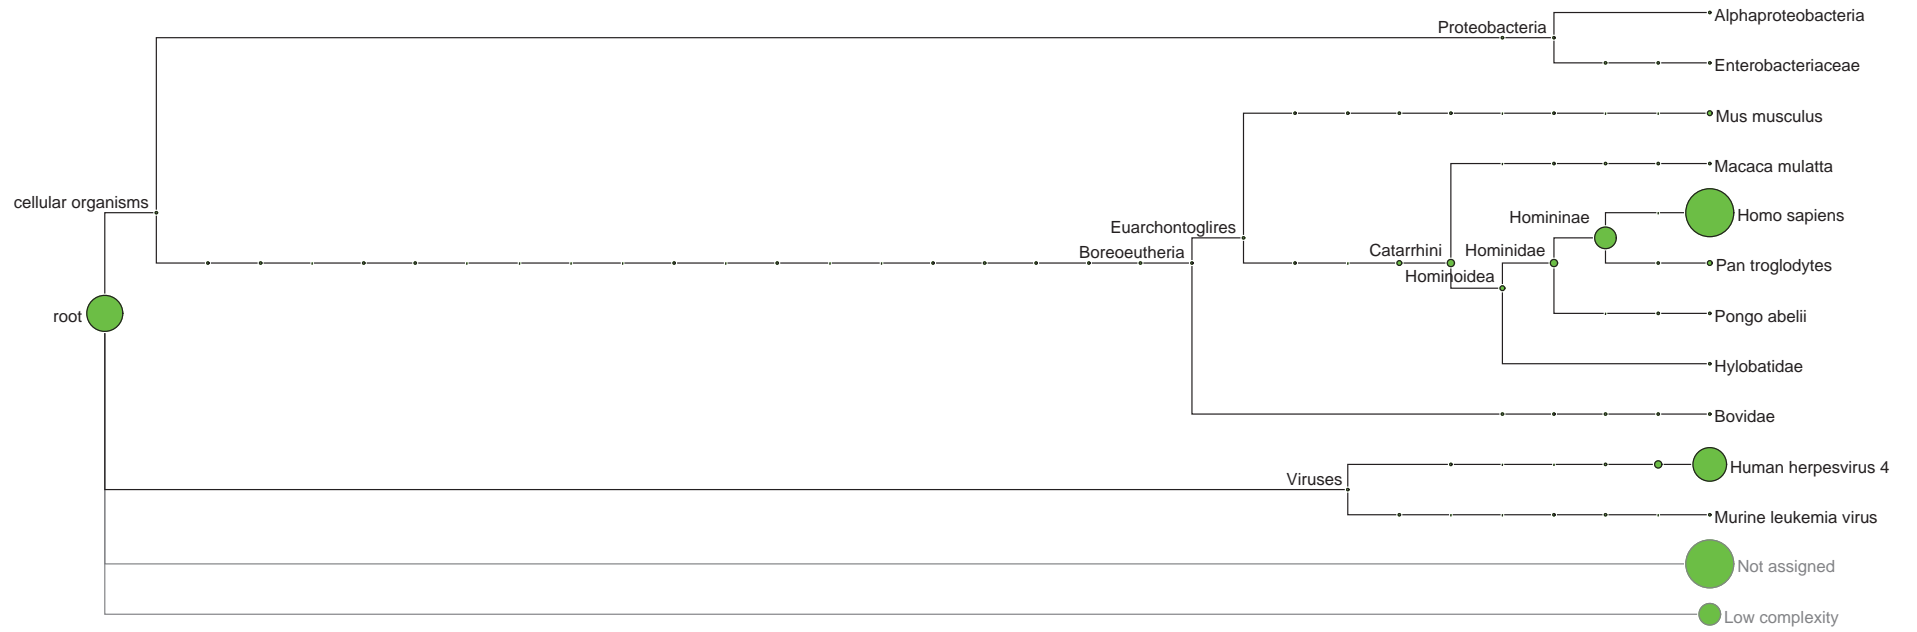

Fig. S2 RNA CoMPASS analysis of x666-1

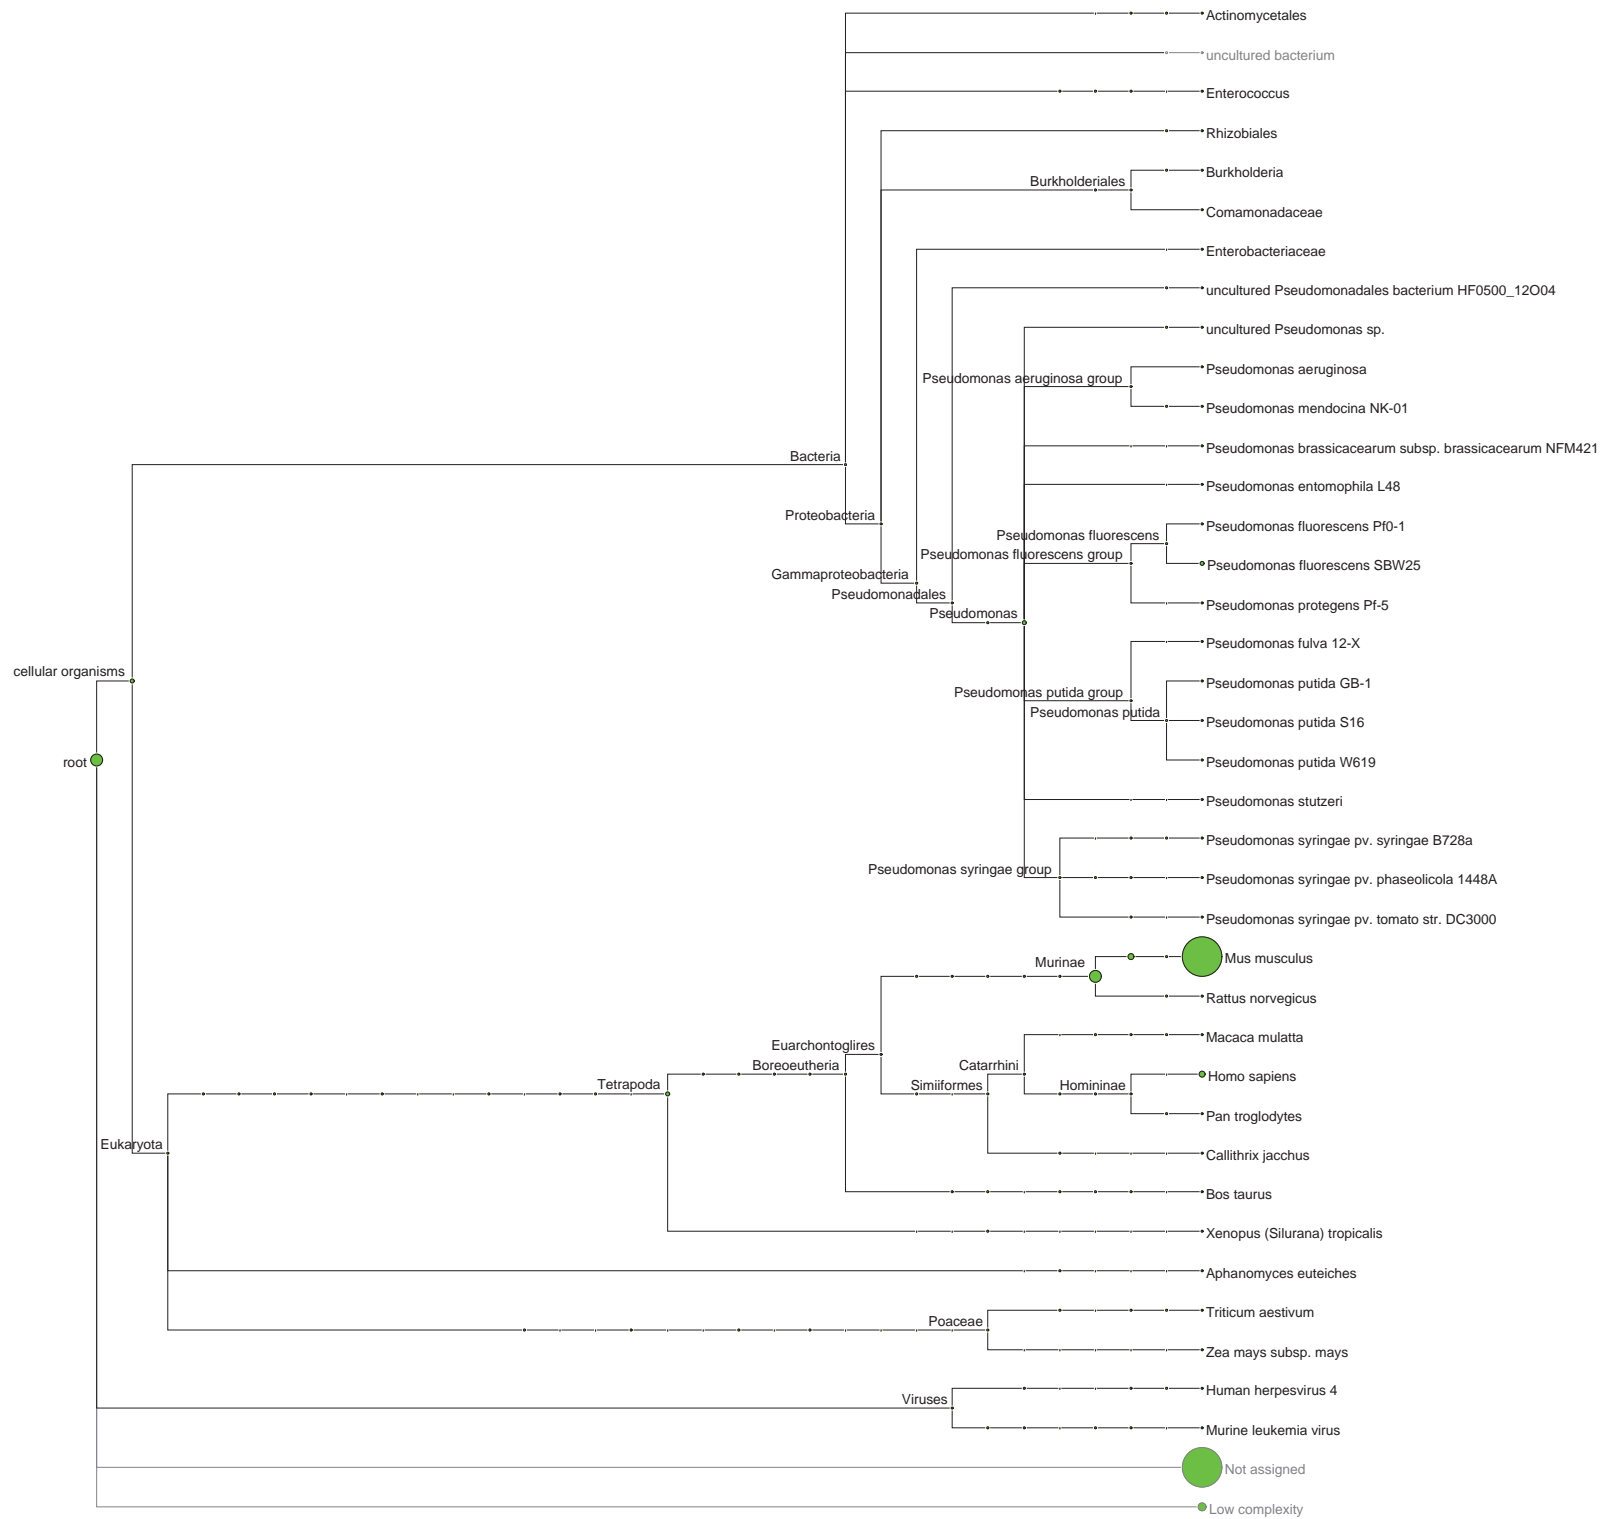

Fig. S3 RNA CoMPASS analysis of CNE1

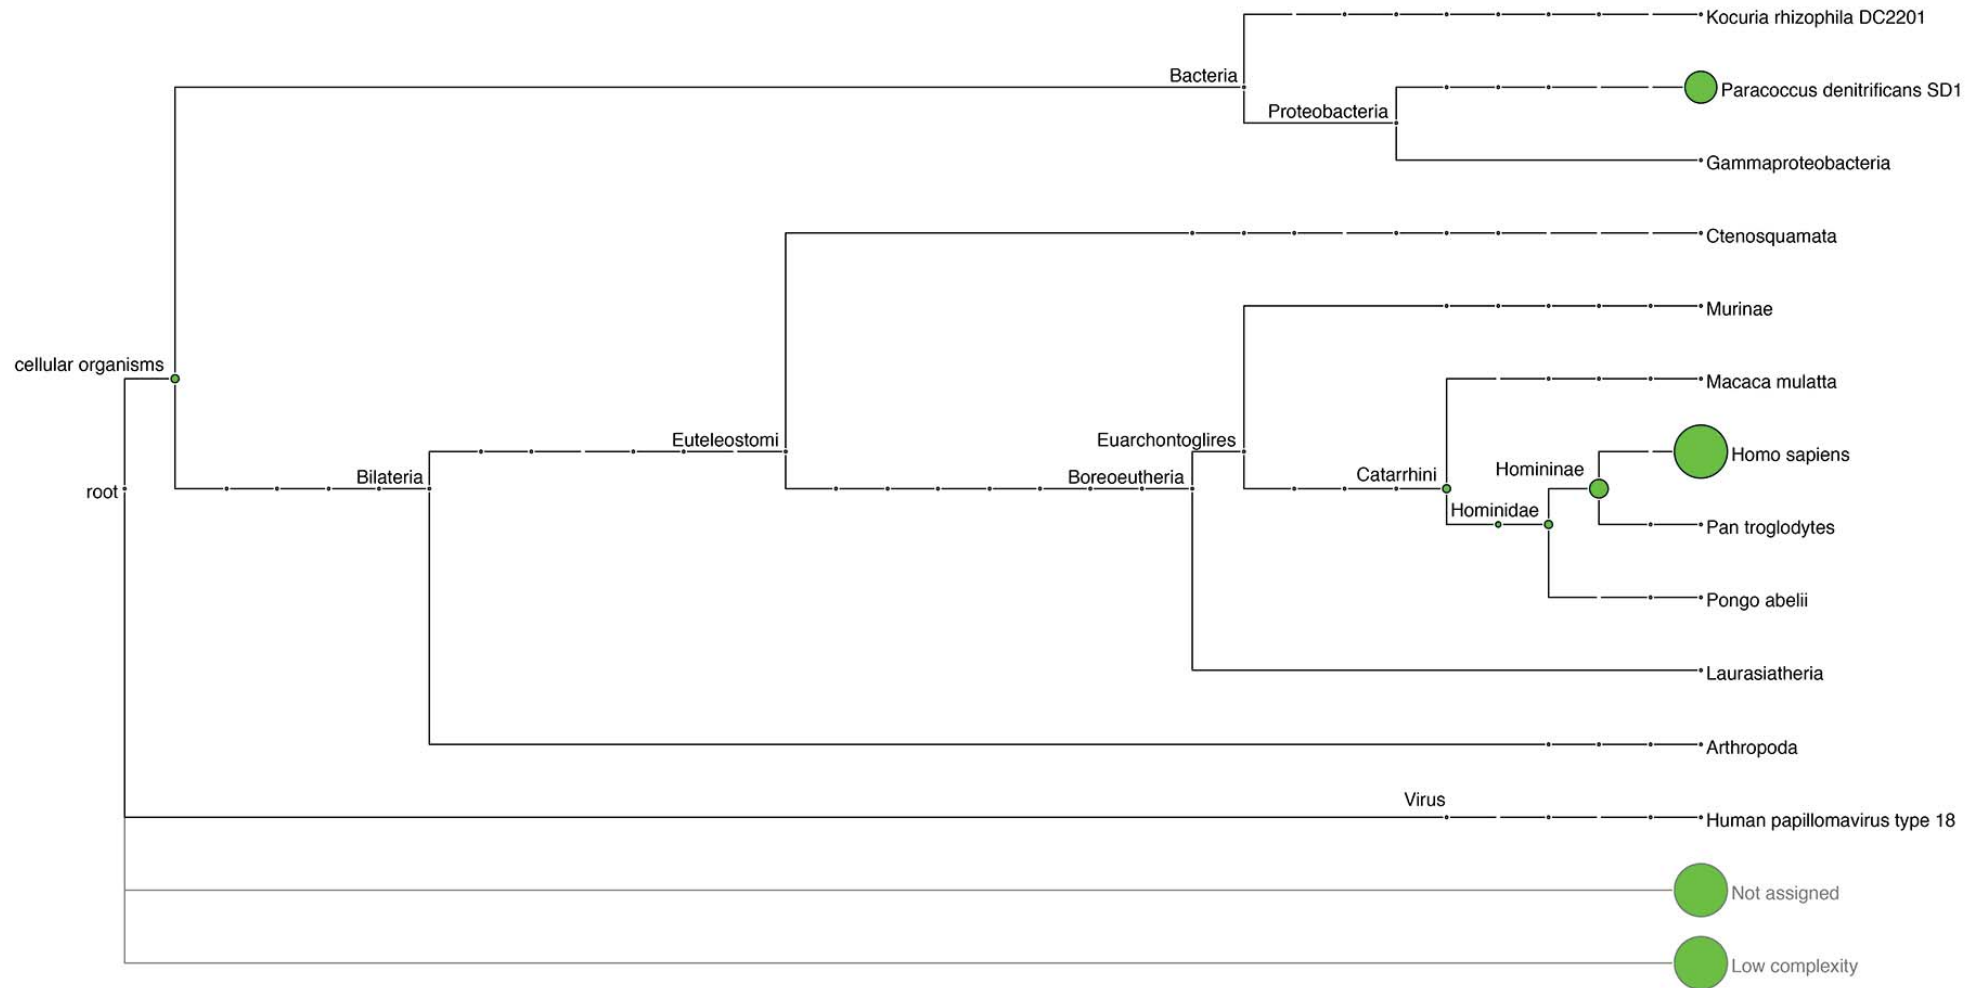

Fig.S4 RNA CoMPASS analysis of HONE1

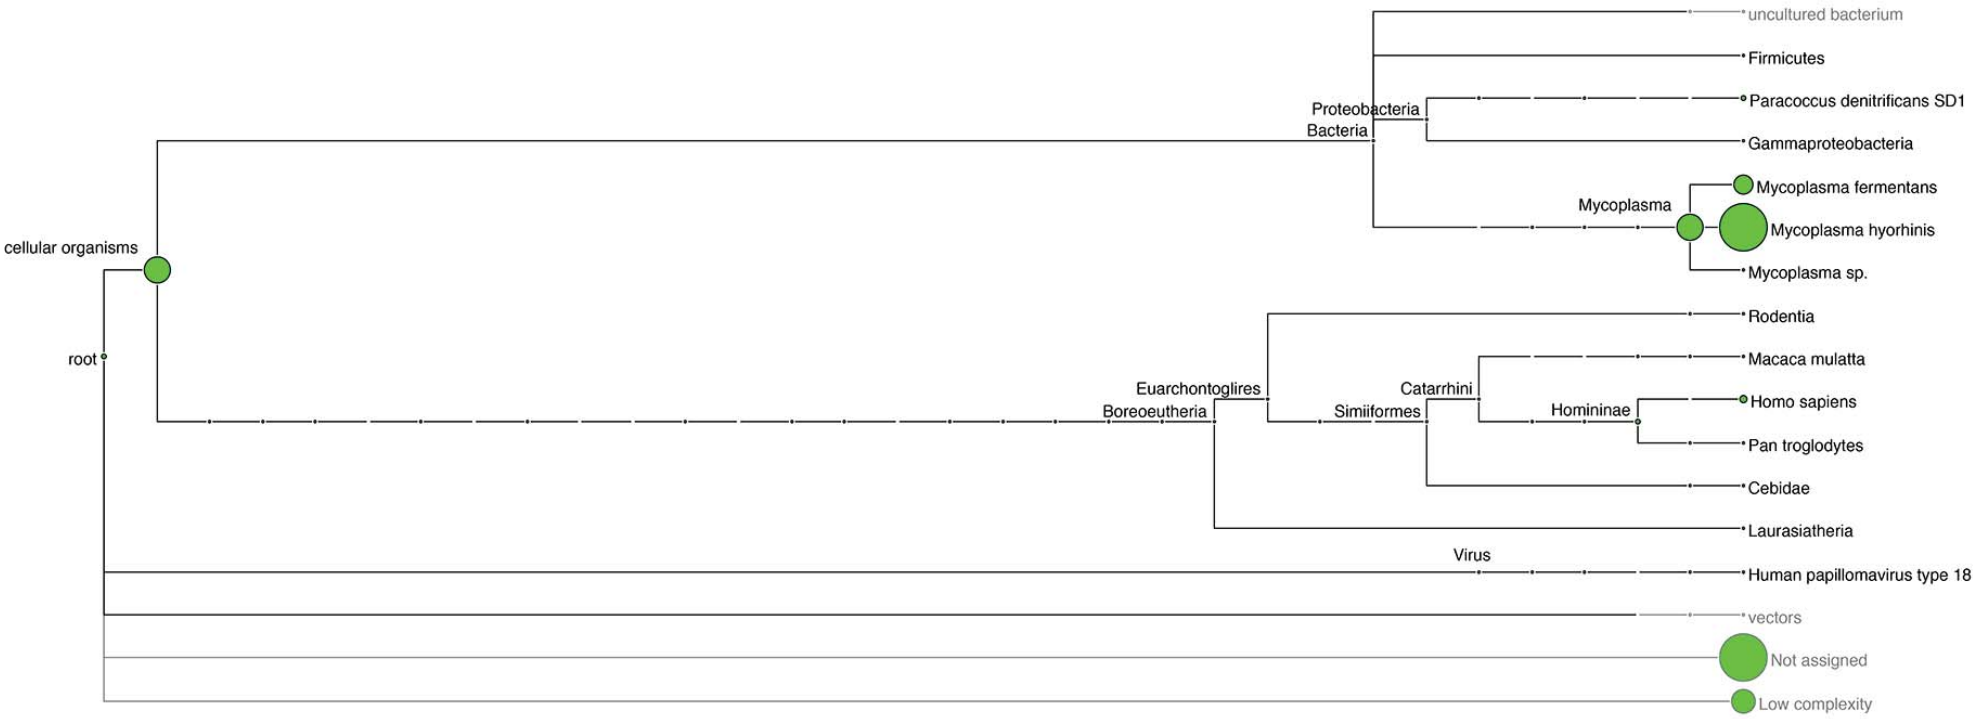

Fig. S5 RNA CoMPASS analysis of HK1

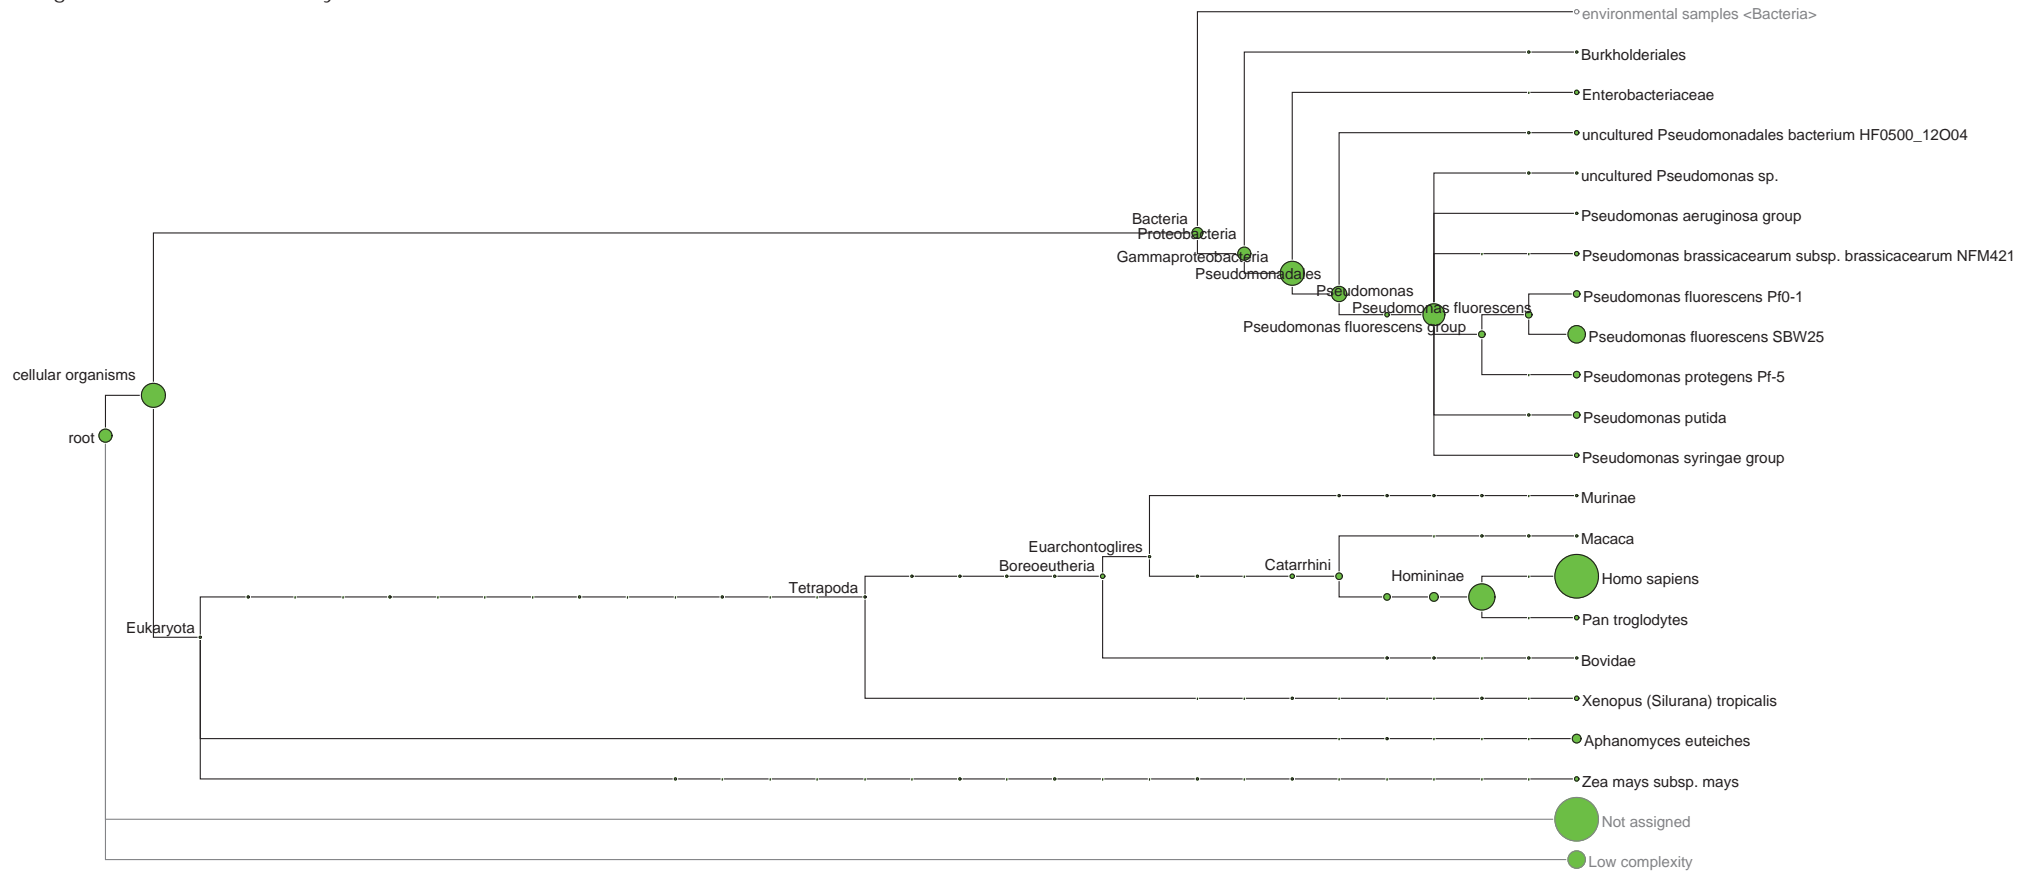



Fig. S6 RNA CoMPASS analysis of NP460

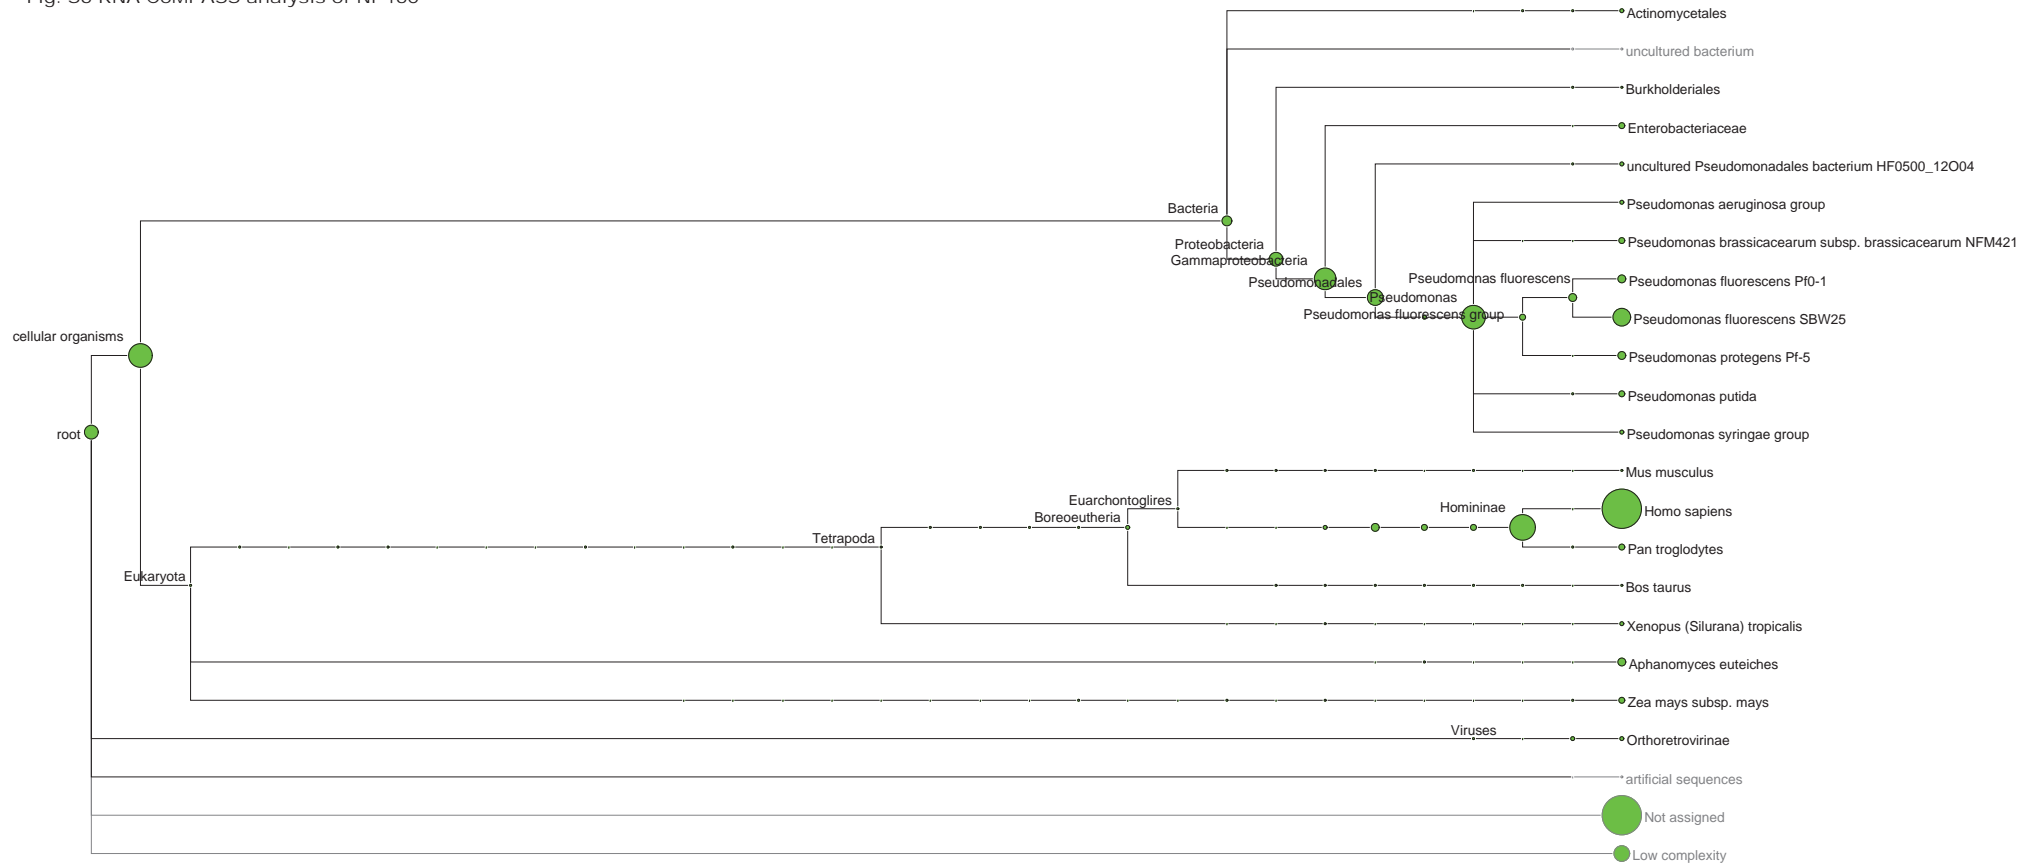

**Fig. S7**

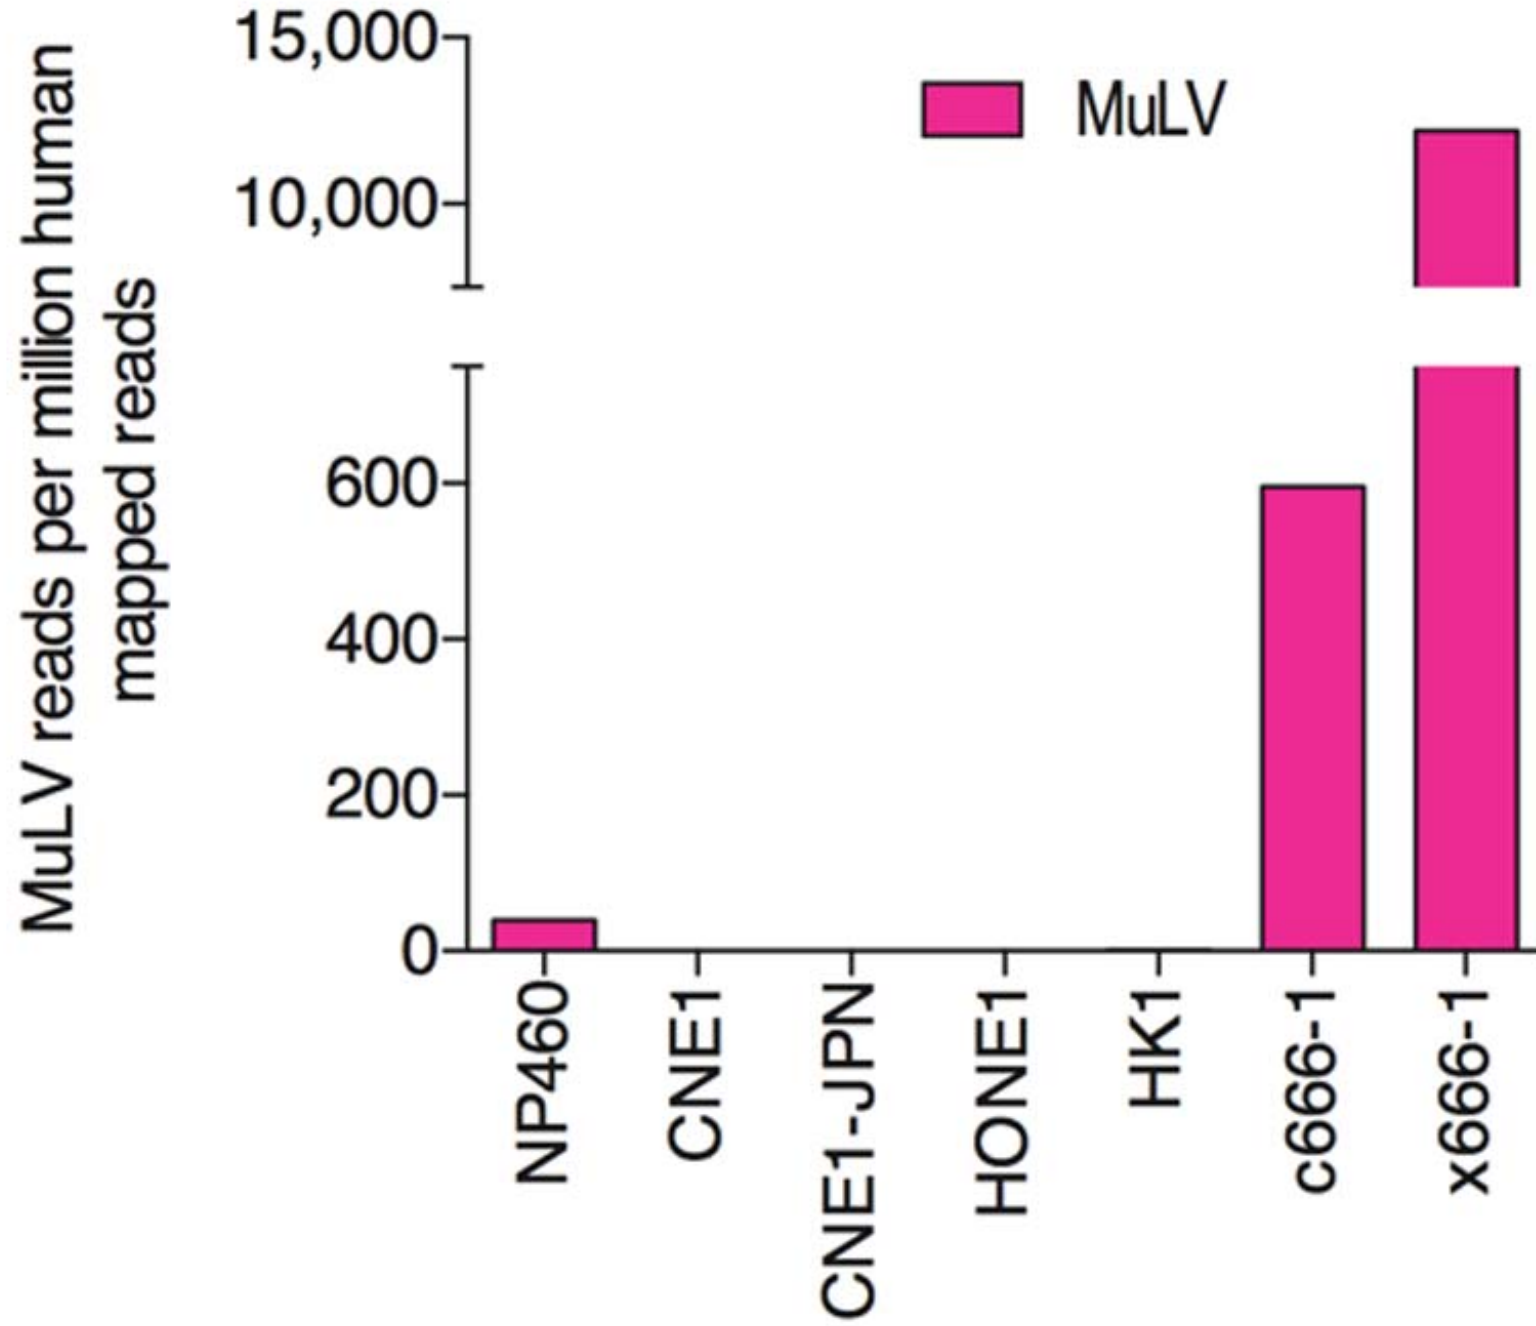

**Fig. S8**

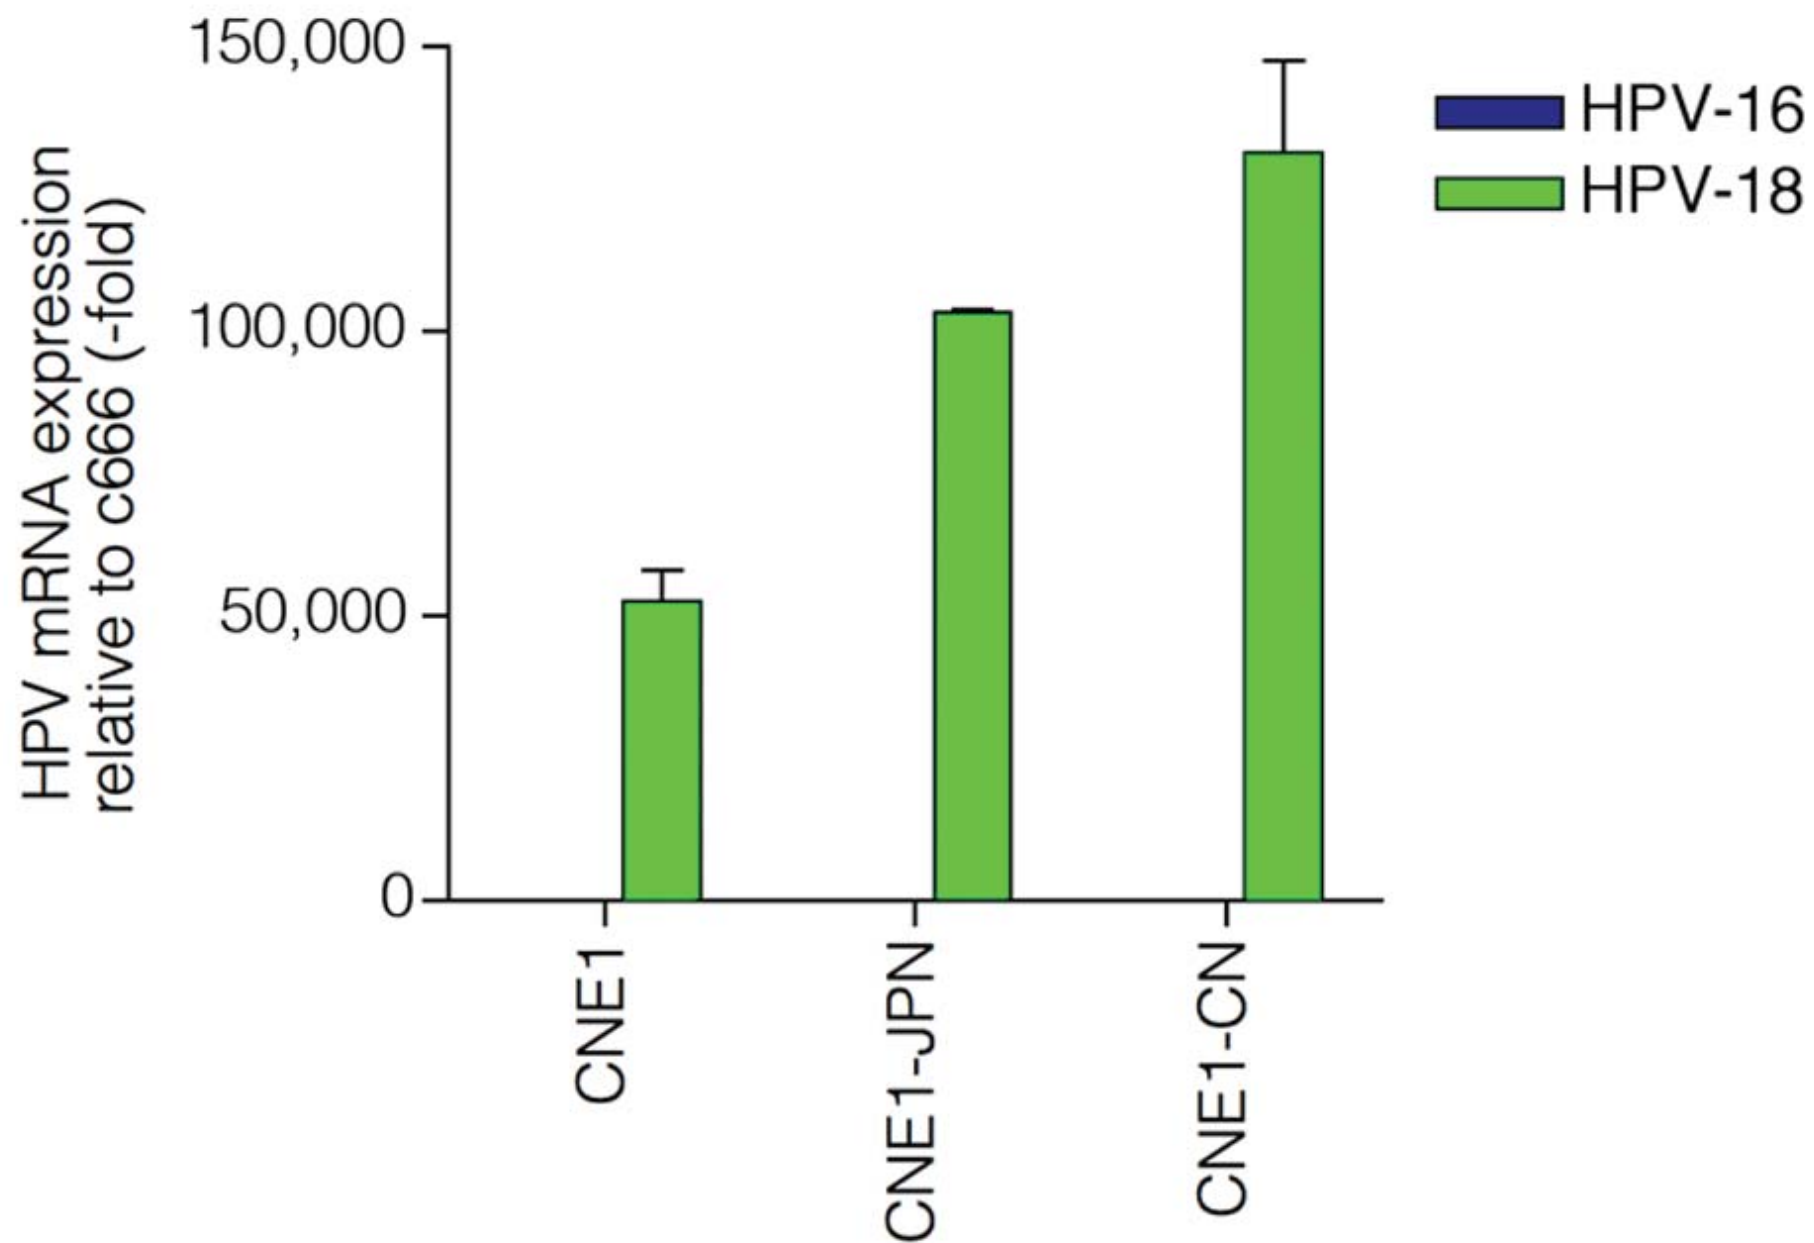

Fig. S9 RNA CoMPASS analysis of CNE1-JPN

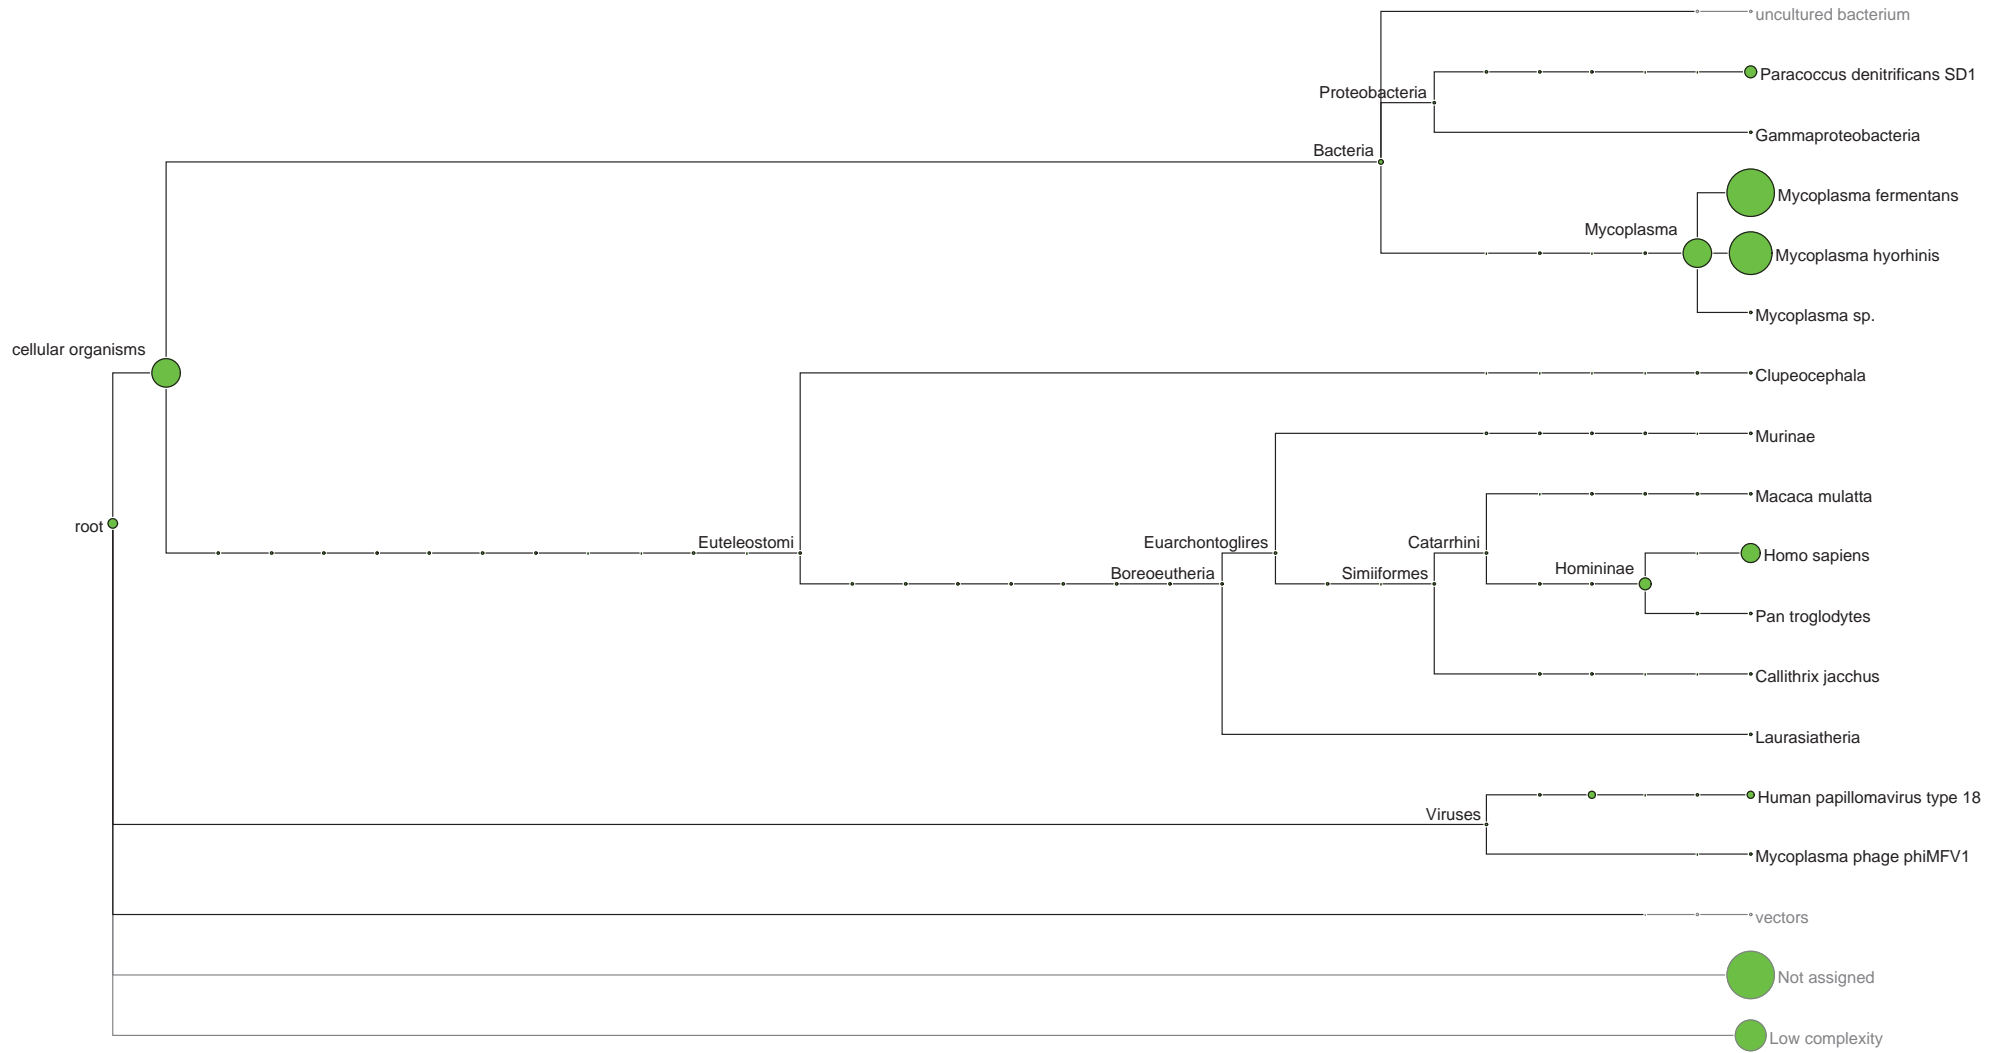

**Fig. S10**

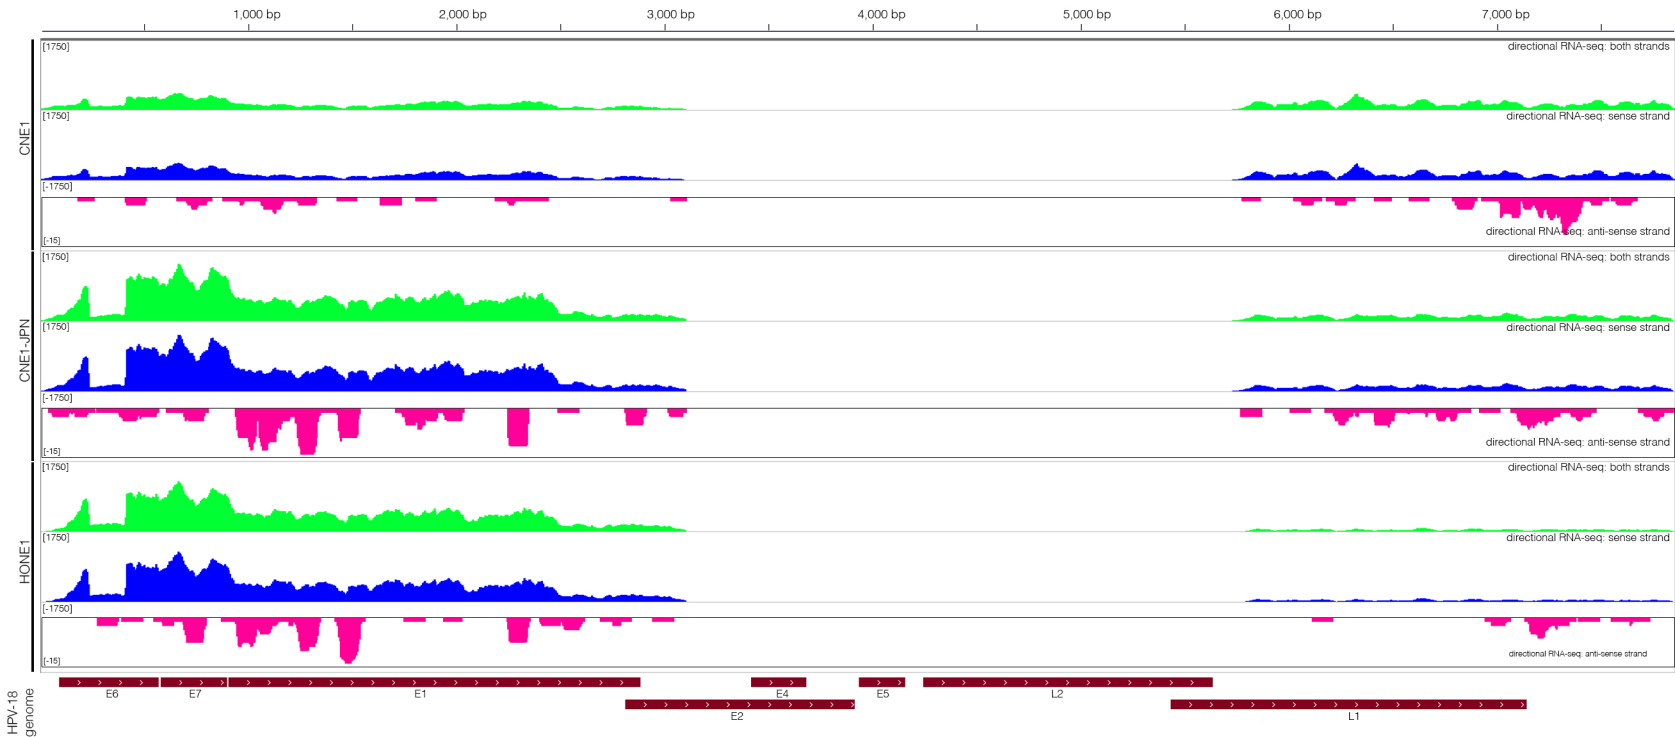

Fig. S11

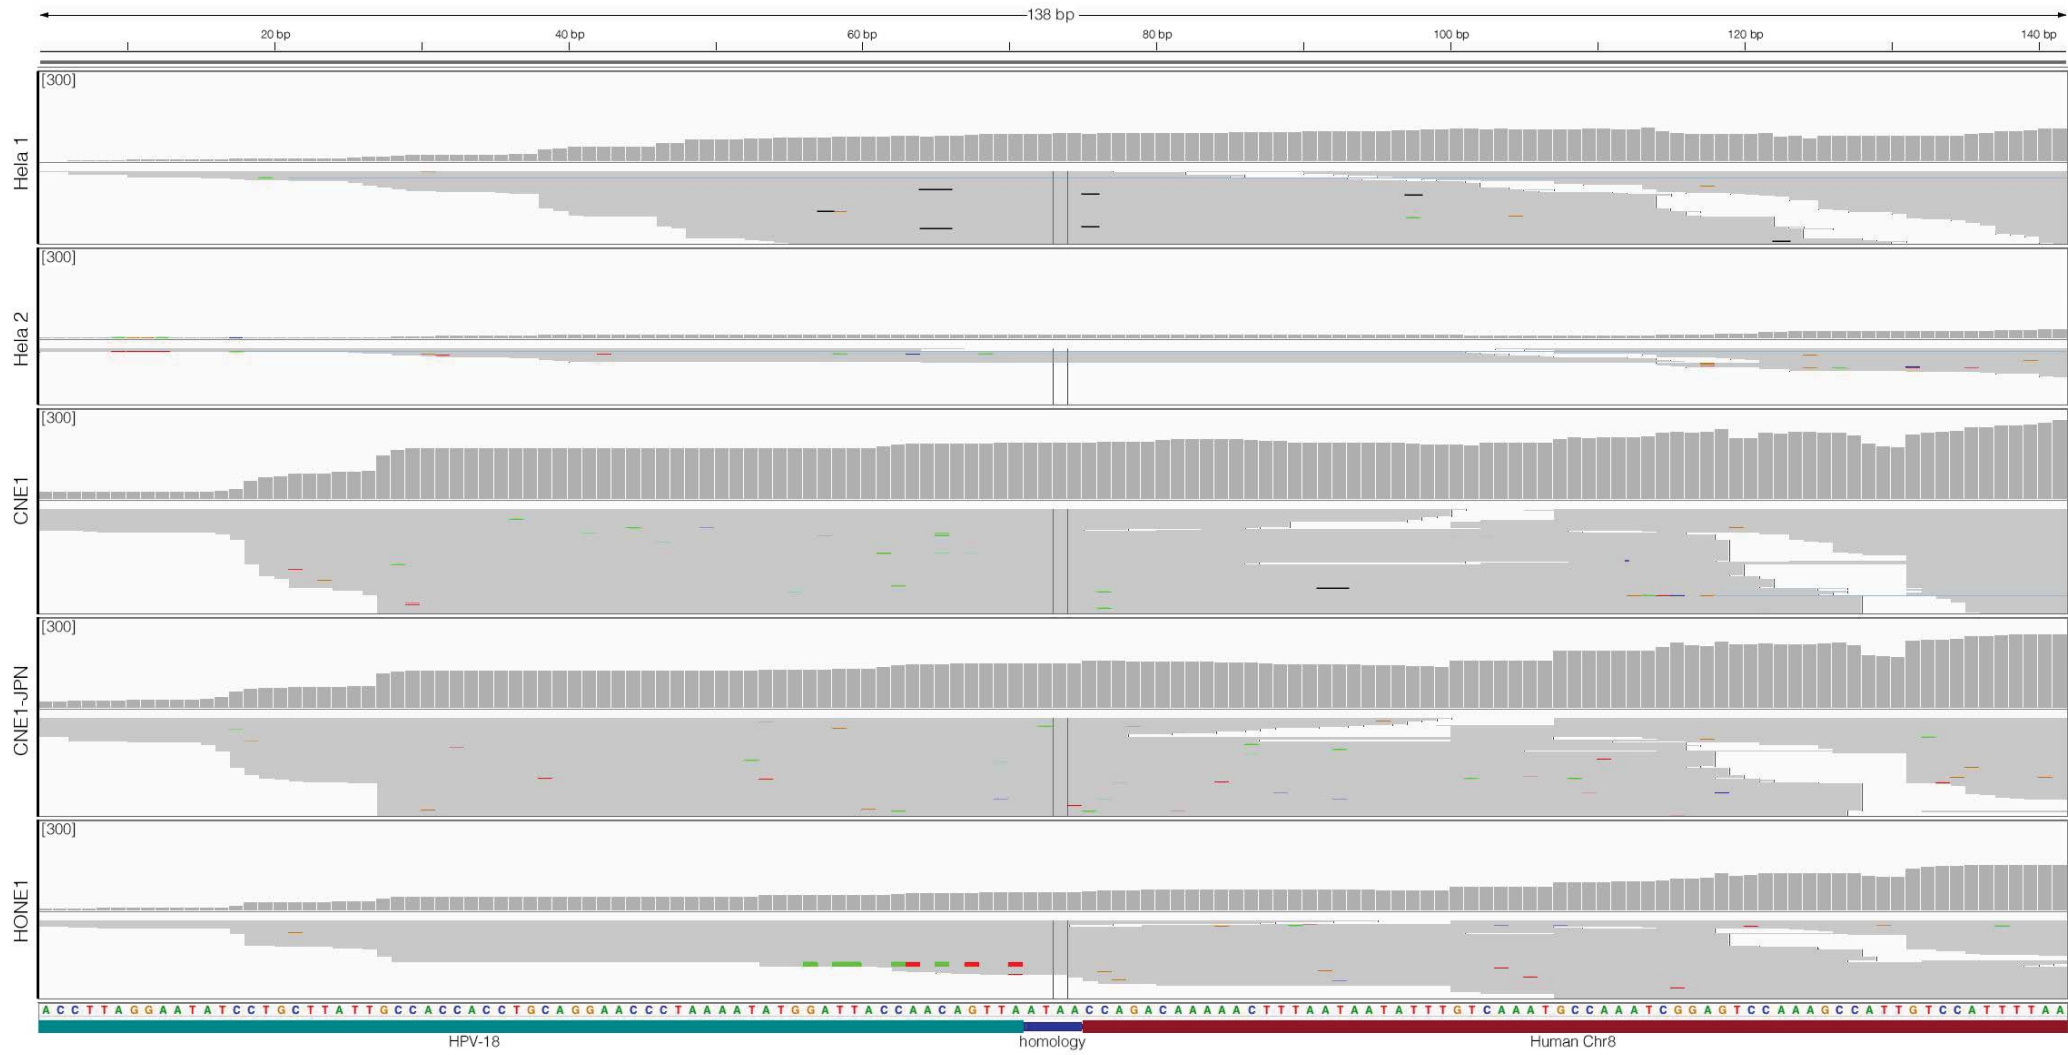



Fig. S13

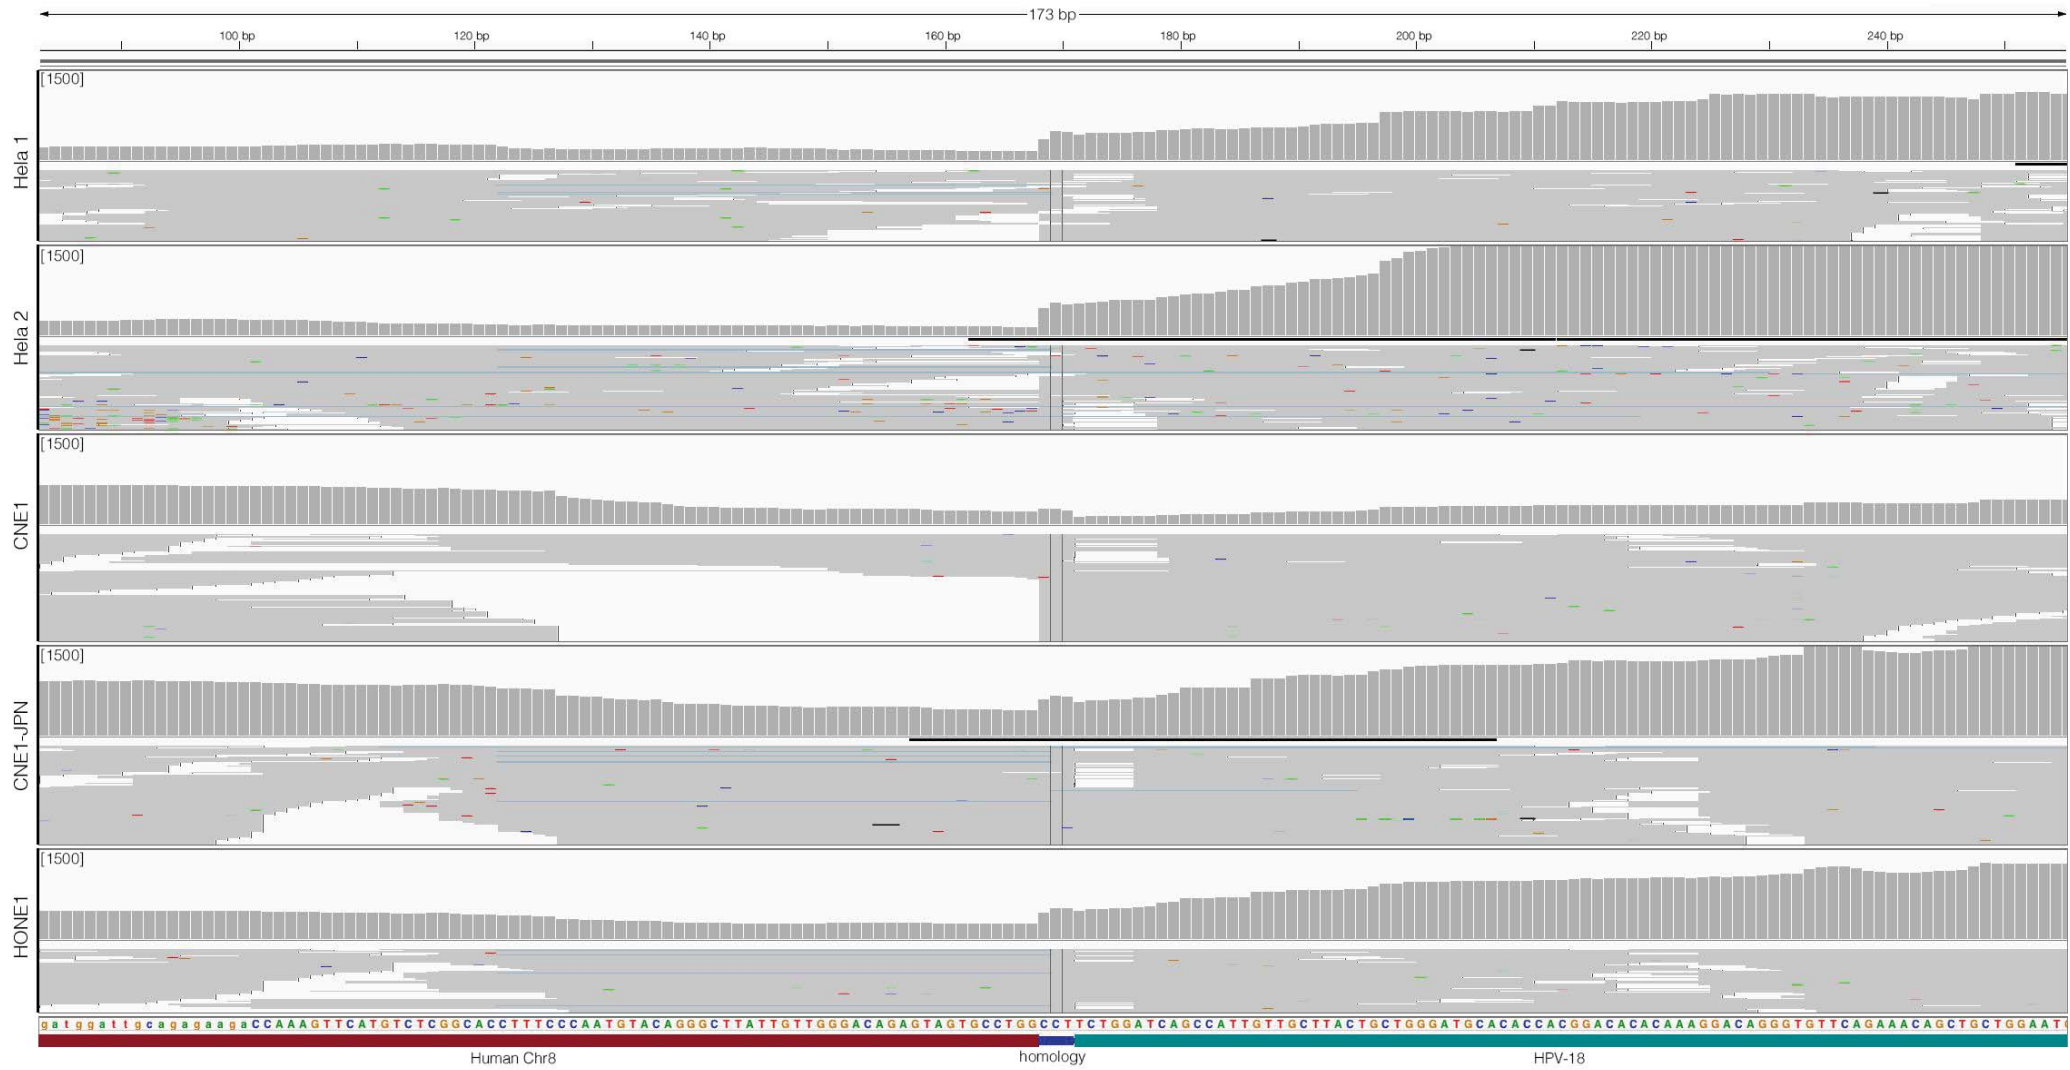



Fig. S14

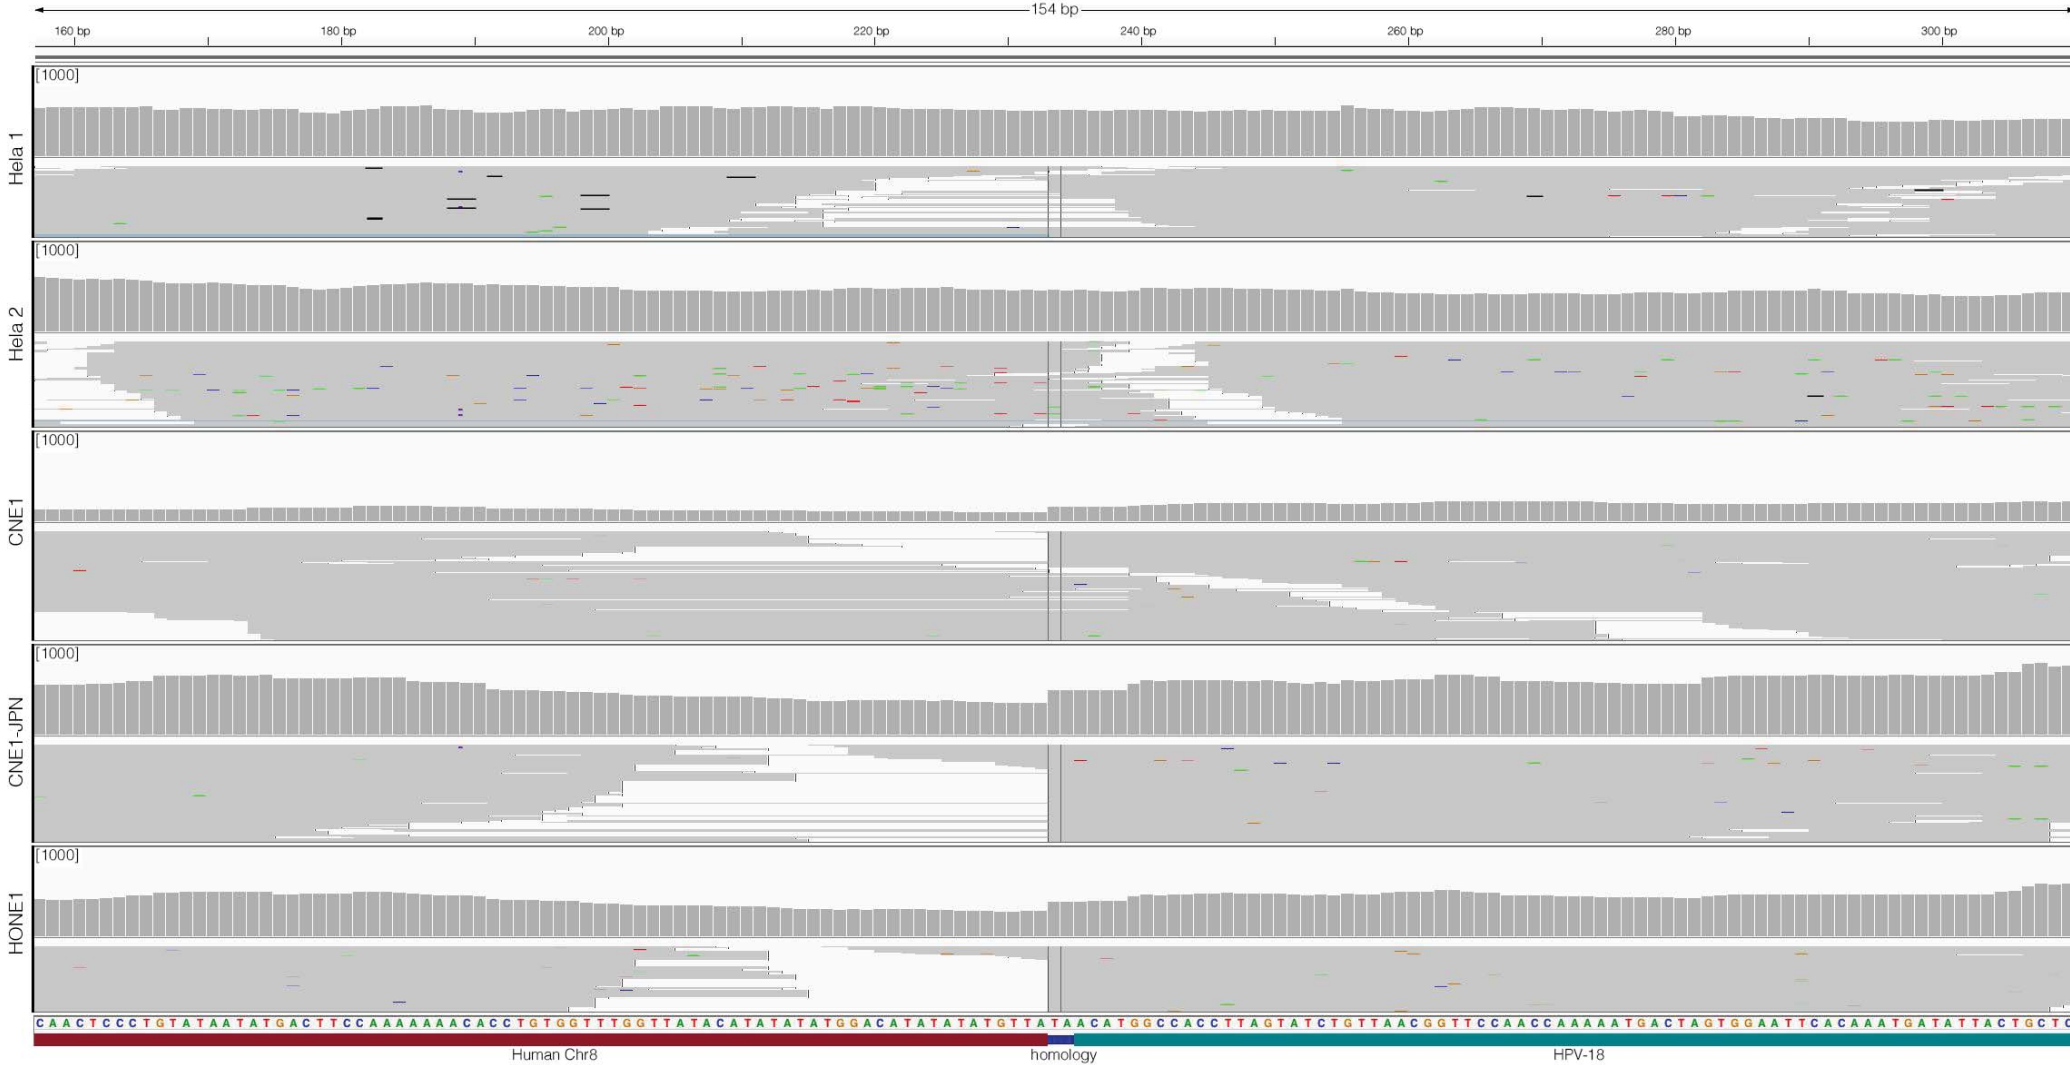

Fig. S15

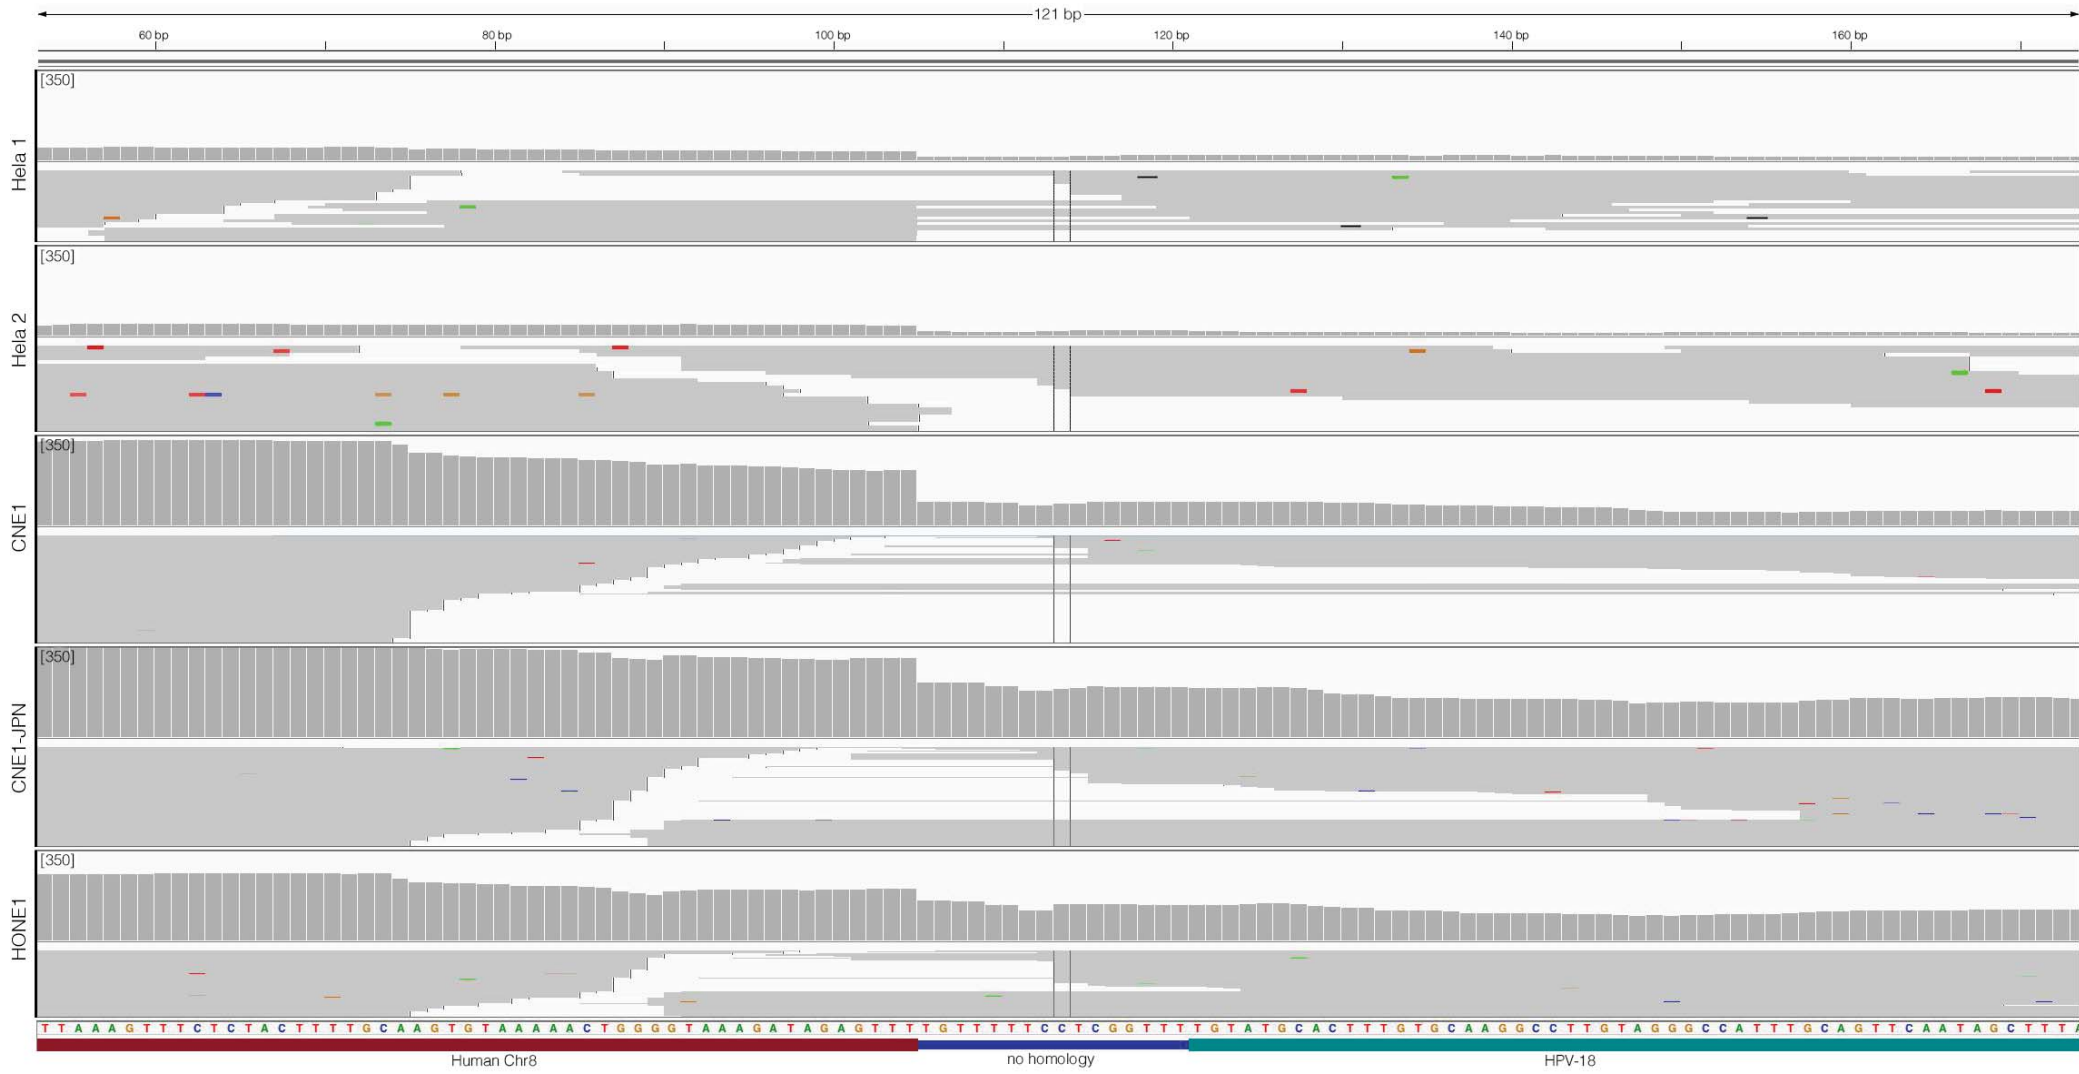

**Fig. S16**

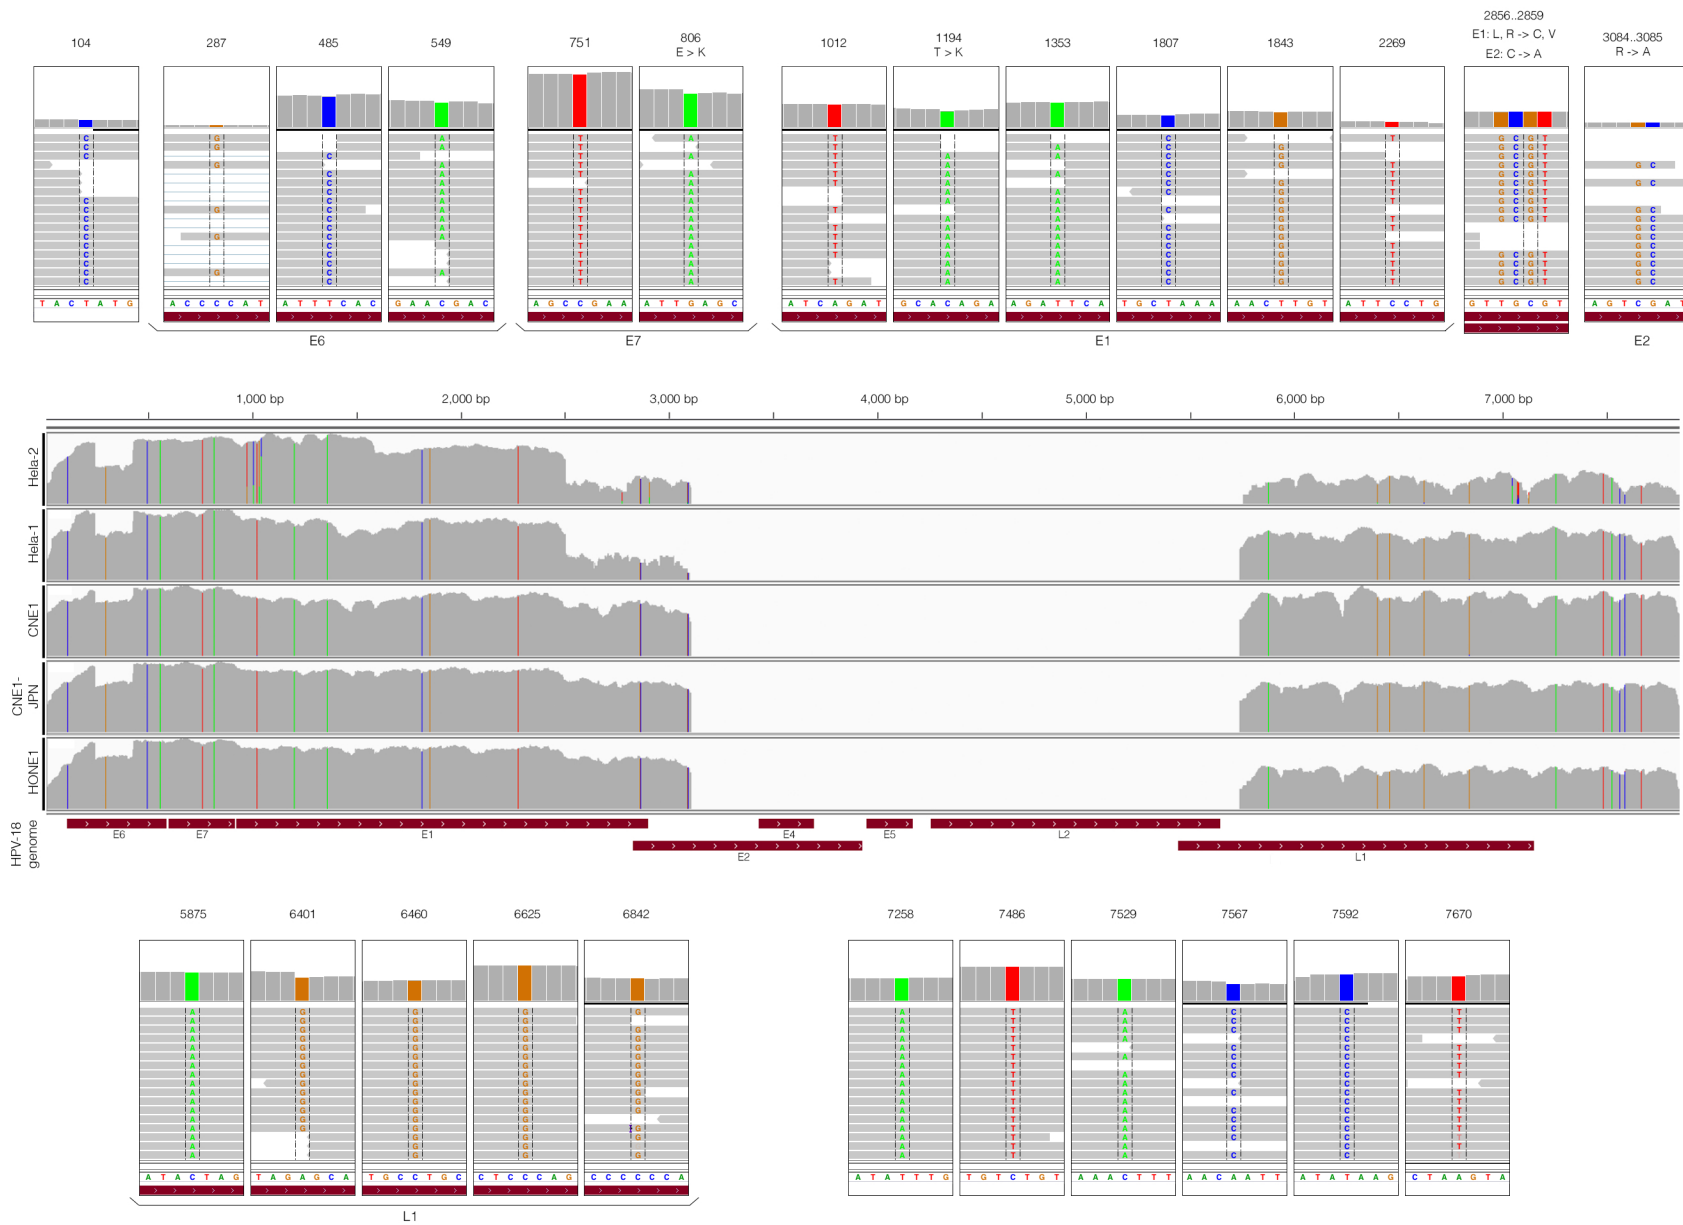

**Fig. S17**

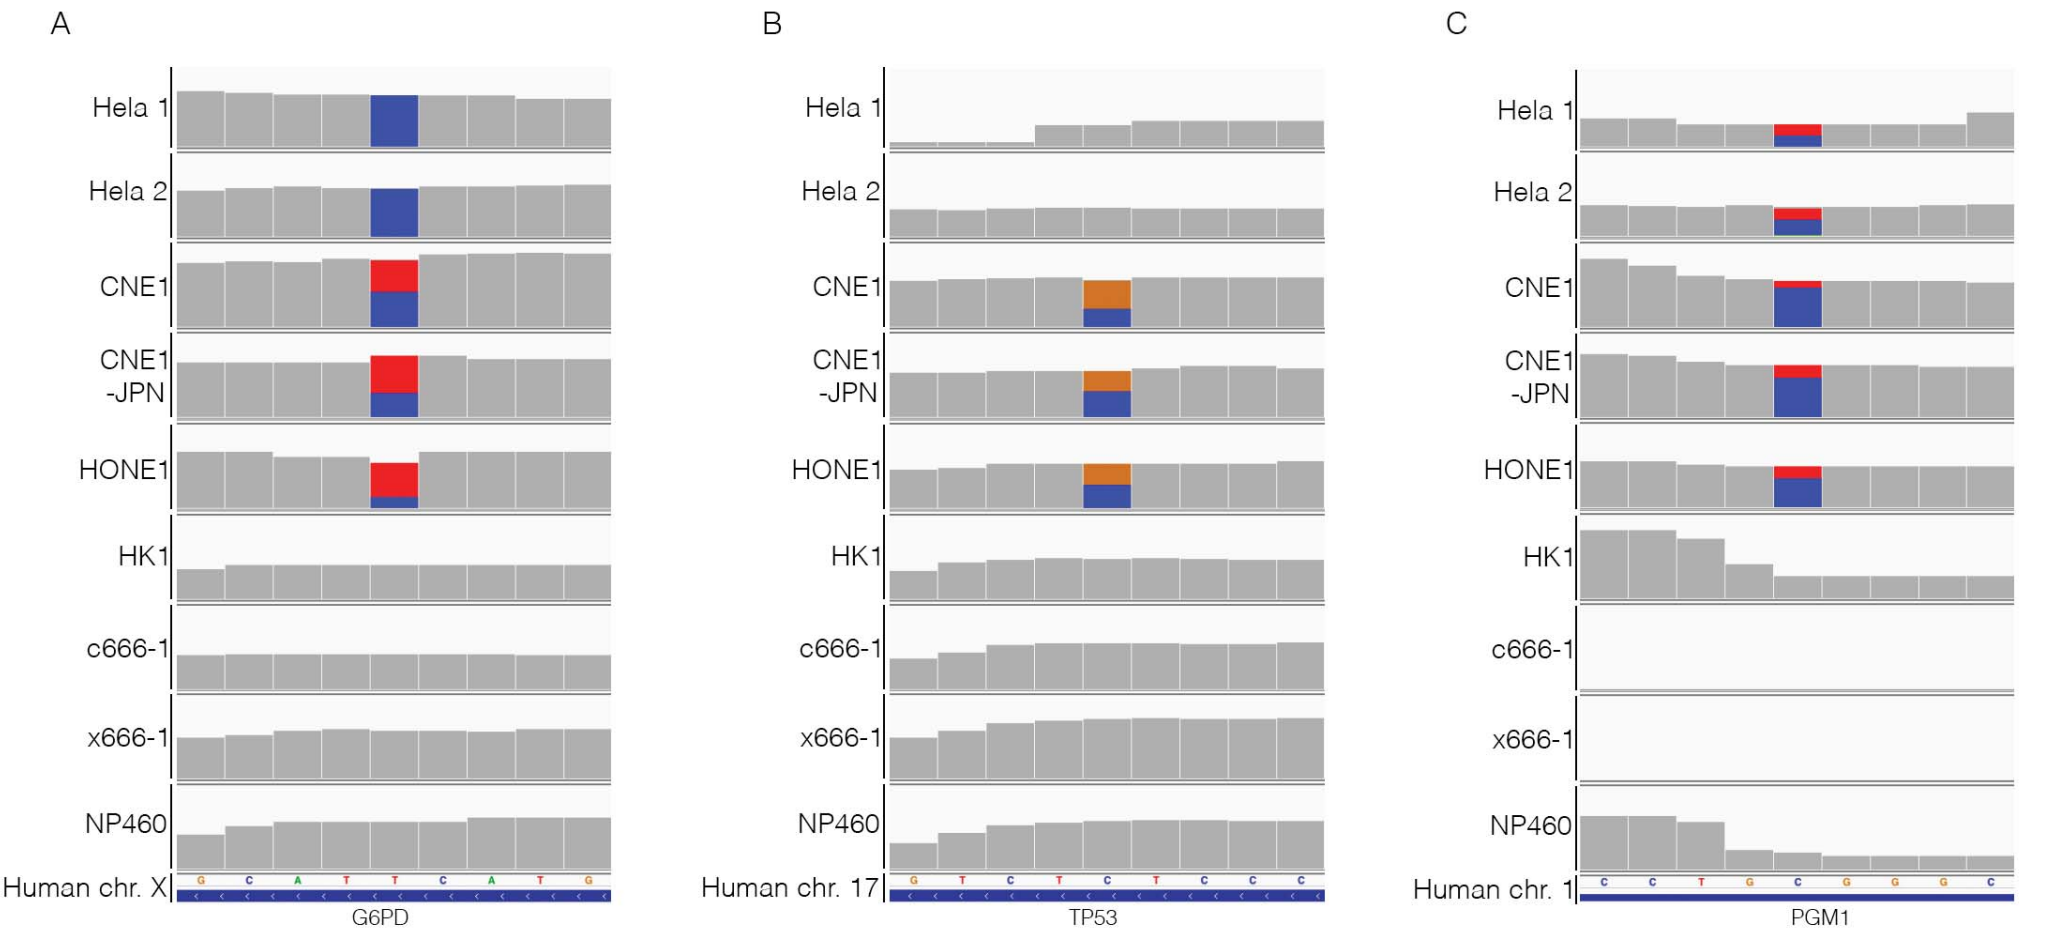

Table S1 List of PCR Primers

|           |                | Forward primer                  | Reverse primer                    |
|-----------|----------------|---------------------------------|-----------------------------------|
| GAPDH     | Reference gene | 5'-GAAATCCCATCACCATCTTCCAGG-3'  | 5'-GAGCCCCAGCCTTCTCCATG-3'        |
| HPV-16    | Reference gene | 5'-TTGCAGATCATCAAGAACACGTAGA-3' | 5'-CAGTAGAGATCAGTTGTCTCTGGTTGC-3' |
| HPV-18    | Reference gene | 5'-AGAGGCCAGTGCCATTCGT-3'       | 5'-GTTTCTCTGCGTCGTTGGAGT-3'       |
| EBV- EBER |                | 5'-GGACCTACGCTGCCCTAGA-3'       | 5'-CAGCTGGTACTTGACCGAAGA-3'       |

Reference for GAPDH primer: West et al, JBC 2004, Vol 279, (28): 28896-28902

Reference for HPV-16 and HPV-18 primers: Lindh et al, J Clin Virol. 2007, Vol 40, (4): 321-4

|         |                             |
|---------|-----------------------------|
| VM164A  | 5'-TGCCTCCTAGATCGTATTCCC-3' |
| VM-164B | 5'-GCACTCTGTGGCATGAAGGT-3'  |
| RB164K2 | 5'-TGGCTCCTCCCTCTATTATCG-3' |

Primers for genotyping of the HeLa-specific L1 retrotransposon marker.

Table S2. List of human viruses used in custom viral genome.

| <b>Accession #</b> | <b>Genome</b>                                                                           |
|--------------------|-----------------------------------------------------------------------------------------|
| NC 001499.1        | Abelson murine leukemia virus complete genome                                           |
| NC 002077.1        | Adeno-associated virus - 1 complete genome                                              |
| NC 001401.2        | Adeno-associated virus - 2 complete genome                                              |
| NC 001729.1        | Adeno-associated virus - 3 complete genome                                              |
| NC 001829.1        | Adeno-associated virus - 4 complete genome                                              |
| NC 006260.1        | Adeno-associated virus - 7 complete genome                                              |
| NC 006261.1        | Adeno-associated virus - 8 complete genome                                              |
| NC 006152.1        | Adeno-associated virus 5 complete genome                                                |
| AF028704.1         | Adeno-associated virus 6 complete genome                                                |
| NC 007548.1        | Adult diarrheal rotavirus strain J19 complete genome                                    |
| NC 007549.1        | Adult diarrheal rotavirus strain J19 complete genome                                    |
| NC 007550.1        | Adult diarrheal rotavirus strain J19 complete genome                                    |
| NC 007551.1        | Adult diarrheal rotavirus strain J19 complete genome                                    |
| NC 007552.1        | Adult diarrheal rotavirus strain J19 complete genome                                    |
| NC 007553.1        | Adult diarrheal rotavirus strain J19 complete genome                                    |
| NC 007554.1        | Adult diarrheal rotavirus strain J19 complete genome                                    |
| NC 007555.1        | Adult diarrheal rotavirus strain J19 complete genome                                    |
| NC 007556.1        | Adult diarrheal rotavirus strain J19 complete genome                                    |
| NC 007557.1        | Adult diarrheal rotavirus strain J19 complete genome                                    |
| NC 007558.1        | Adult diarrheal rotavirus strain J19 complete genome                                    |
| NC 012932.1        | Aedes flavivirus complete genome                                                        |
| NC 015451.1        | Aguacate virus segment L complete genome                                                |
| NC 015450.1        | Aguacate virus segment M complete genome                                                |
| NC 015452.1        | Aguacate virus segment S complete genome                                                |
| NC 018459.1        | Aino virus Gn-Gc-NSm gene for M polyprotein segment M genomic RNA isolate 38K           |
| NC 018460.1        | Aino virus N and NSs genes segment S genomic RNA isolate 38K                            |
| NC 018465.1        | Aino virus RdRp gene for RNA-dependent RNA polymerase segment L genomic RNA isolate 38K |
| NC 009894.1        | Akabane virus segment L complete sequence                                               |
| NC 009895.1        | Akabane virus segment M complete sequence                                               |

NC 009896.1 Akabane virus segment S complete sequence  
NC 004355.1 Alkhurma virus complete genome  
NC 010249.1 Allpahuayo virus segment L complete sequence  
NC 010253.1 Allpahuayo virus segment S complete sequence  
NC 010251.1 Amapari virus segment L complete sequence  
NC 010247.1 Amapari virus segment S complete sequence  
NC 003468.2 Andes virus segment L complete genome  
NC 003467.2 Andes virus segment M complete genome  
NC 003466.1 Andes virus segment S complete sequence  
NC 003676.1 Apoi virus genome  
NC 020808.1 Aravan virus complete genome  
NC 023635.1 Arumowot virus segment L complete sequence  
NC 023633.1 Arumowot virus segment M complete sequence  
NC 023634.1 Arumowot virus segment S complete sequence  
NC 003243.1 Australian bat lyssavirus complete genome  
NC 007652.1 Avian metapneumovirus  
NC 019531.1 Avian paramyxovirus 4 strain APMV-4/duck/Delaware/549227/2010 complete genome  
NC 003043.1 Avian paramyxovirus 6 complete genome  
NC 012534.1 Bagaza virus complete genome  
NC 004211.1 Banna virus segment 1 complete sequence  
NC 004201.1 Banna virus segment 10 complete sequence  
NC 004200.1 Banna virus segment 11 complete sequence  
NC 004198.1 Banna virus segment 12 complete sequence  
NC 004217.1 Banna virus segment 2 complete sequence  
NC 004218.1 Banna virus segment 3 complete sequence  
NC 004219.1 Banna virus segment 4 complete sequence  
NC 004220.1 Banna virus segment 5 complete sequence  
NC 004221.1 Banna virus segment 6 complete sequence  
NC 004204.1 Banna virus segment 7 complete sequence  
NC 004203.1 Banna virus segment 8 complete sequence

NC 004202.1 Banna virus segment 9 complete sequence  
NC 018382.1 Bat hepevirus complete genome  
NC 017936.1 Bat sapovirus TLC58 HK complete genome  
NC 010255.1 Bear Canyon virus segment L complete sequence  
NC 010256.1 Bear Canyon virus segment S complete sequence  
NC 007803.1 Beilong virus complete genome  
NC 001538.1 BK polyomavirus complete genome  
NC 001607.1 Born disease virus complete genome  
NC 002161.1 Bovine parainfluenza virus 3 complete genome  
NC 001989.1 Bovine respiratory syncytial virus complete genome  
NC 022039.1 Brazoran virus segment L complete sequence  
NC 022038.1 Brazoran virus segment M complete sequence  
NC 022037.1 Brazoran virus segment S complete sequence  
NC 014373.1 Bundibugyo ebolavirus complete genome  
NC 001925.1 Bunyamwera virus L segment complete sequence  
NC 001926.1 Bunyamwera virus M segment complete sequence  
NC 001927.1 Bunyamwera virus segment S complete sequence  
NC 009026.2 Bussuquara virus complete genome  
NC 012126.1 California sea lion anellovirus complete genome  
NC 015374.1 Candiru virus segment L complete genome  
NC 015373.1 Candiru virus segment M complete genome  
NC 015375.1 Candiru virus segment S complete genome  
NC 001921.1 Canine distemper virus complete genome  
NC 018484.1 CAS virus segment L complete genome  
NC 018481.1 CAS virus segment S complete genome  
NC 001564.1 Cell fusing agent virus complete genome  
NC 020805.1 Chandipura virus isolate CIN 0451 complete genome  
NC 017086.1 Chaoyang virus complete genome  
NC 010563.1 Chapare virus segment L complete sequence  
NC 010562.1 Chapare virus segment S complete sequence



NC 004162.2 Chikungunya virus complete genome  
NC 015692.1 Colobus guereza papillomavirus type 2 complete genome  
NC 004181.1 Colorado tick fever virus segment 1 complete sequence  
NC 004189.1 Colorado tick fever virus segment 10 complete sequence  
NC 004191.1 Colorado tick fever virus segment 11 complete sequence  
NC 004190.1 Colorado tick fever virus segment 12 complete sequence  
NC 004182.1 Colorado tick fever virus segment 2 complete sequence  
NC 004183.1 Colorado tick fever virus segment 3 complete sequence  
NC 004184.1 Colorado tick fever virus segment 4 complete sequence  
NC 004185.1 Colorado tick fever virus segment 5 complete sequence  
NC 004186.1 Colorado tick fever virus segment 6 complete sequence  
NC 004187.1 Colorado tick fever virus segment 7 complete sequence  
NC 004188.1 Colorado tick fever virus segment 8 complete sequence  
NC 004180.1 Colorado tick fever virus segment 9 complete sequence  
NC 014372.1 Cote d'Ivoire ebolavirus  
NC 005301.3 Crimean-Congo hemorrhagic fever virus segment L complete sequence  
NC 005300.2 Crimean-Congo hemorrhagic fever virus segment M complete sequence  
NC 005302.1 Crimean-Congo hemorrhagic fever virus segment S complete sequence  
NC 008604.2 Culex flavivirus complete genome  
NC 010252.1 Cupixi virus segment L complete sequence  
NC 010254.1 Cupixi virus segment S complete sequence  
NC 015521.1 Cutthroat trout virus complete genome  
NC 001477.1 Dengue virus 1 complete genome  
NC 001474.2 Dengue virus 2 complete genome  
NC 001475.2 Dengue virus 3 complete genome  
NC 002640.1 Dengue virus 4 complete genome  
NC 005234.1 Dobrava virus segment M complete sequence  
NC 005233.1 Dobrava virus segment S complete sequence  
NC 005235.1 Dobrava-Belgrade virus strain DOBV/Ano-Poroia/Afl9/1999  
NC 005283.1 Dolphin morbillivirus complete genome

NC 016997.1 Donggang virus complete genome  
NC 004159.1 Dugbe virus segment L complete sequence  
NC 004158.1 Dugbe virus segment M complete sequence  
NC 004157.1 Dugbe virus segment S complete sequence  
NC 020810.1 Duvenhage virus isolate 86132SA complete genome  
NC 002549.1 Ebola virus - Mayinga Zaire 1976 strain Mayinga  
NC 008718.1 Entebbe bat virus complete genome  
NC 009527.1 European bat lyssavirus 1 complete genome  
NC 009528.1 European bat lyssavirus 2 complete genome  
NC 003696.1 Eyach virus segment 1 complete genome  
NC 003705.1 Eyach virus segment 10 complete genome  
NC 003706.1 Eyach virus segment 11 complete genome  
NC 003707.1 Eyach virus segment 12 complete genome  
NC 003697.1 Eyach virus segment 2 complete genome  
NC 003698.1 Eyach virus segment 3 complete genome  
NC 003699.1 Eyach virus segment 4 complete genome  
NC 003700.1 Eyach virus segment 5 complete genome  
NC 003701.1 Eyach virus segment 6 complete genome  
NC 003702.1 Eyach virus segment 7 complete genome  
NC 003703.1 Eyach virus segment 8 complete genome  
NC 003704.1 Eyach virus segment 9 complete genome  
NC 005084.2 Fer-de-lance virus complete genome  
NC 010759.1 Flexal virus segment L complete sequence  
NC 010757.1 Flexal virus segment S complete sequence  
NC 001362.1 Friend murine leukemia virus complete genome  
NC 001710.1 GB virus C/Hepatitis G virus complete genome  
NC 018482.1 Golden Gate virus segment L complete genome  
NC 018483.1 Golden Gate virus segment S complete genome  
NC 005036.1 Goose paramyxovirus SF02 complete genome  
NC 014522.1 Great Island virus segment 1 complete genome

NC 014531.1 Great Island virus segment 10 complete genome  
NC 014523.1 Great Island virus segment 2 complete genome  
NC 014524.1 Great Island virus segment 3 complete genome  
NC 014525.1 Great Island virus segment 4 complete genome  
NC 014526.1 Great Island virus segment 5 complete genome  
NC 014527.1 Great Island virus segment 6 complete genome  
NC 014528.1 Great Island virus segment 7 complete genome  
NC 014529.1 Great Island virus segment 8 complete genome  
NC 014530.1 Great Island virus segment 9 complete genome  
NC 005082.1 Guanarito virus segment L complete genome  
NC 005077.1 Guanarito virus segment S complete genome  
NC 005218.1 Hantaan virus complete genome  
NC 005219.1 Hantaan virus complete genome  
NC 005222.1 Hantaan virus segment L complete genome  
NC 006435.1 Hantavirus Z10 chromosome L complete genome  
NC 006433.1 Hantavirus Z10 chromosome S segment complete genome  
NC 006437.1 Hantavirus Z10 segment M complete genome  
NC 001906.3 Hendra virus complete genome  
NC 003977.1 Hepatitis B virus complete genome  
NC 004102.1 Hepatitis C virus genotype 1 complete genome  
NC 009823.1 Hepatitis C virus genotype 2 complete genome  
NC 009824.1 Hepatitis C virus genotype 3 genome  
NC 009825.1 Hepatitis C virus genotype 4 genome  
NC 009826.1 Hepatitis C virus genotype 5 genome  
NC 009827.1 Hepatitis C virus genotype 6 complete genome  
NC 001653.2 Hepatitis delta virus complete genome  
NC 001434.1 Hepatitis E virus complete genome  
NC 012959.1 Human adenovirus 54 complete genome  
NC 001460.1 Human adenovirus A complete genome  
NC 011203.1 Human adenovirus B1 complete genome

NC 011202.1 Human adenovirus B2 complete genome  
NC 001405.1 Human adenovirus C complete genome  
NC 010956.1 Human adenovirus D complete genome  
NC 003266.2 Human adenovirus E complete genome  
NC 001454.1 Human adenovirus F complete genome  
NC 001943.1 Human astrovirus complete genome  
NC 007455.1 Human bocavirus complete genome  
NC 012042.1 Human bocavirus 2 complete genome  
NC 012564.1 Human bocavirus 3 complete genome  
NC 012729.2 Human bocavirus 4 complete genome  
NC 002645.1 Human coronavirus 229E complete genome  
NC 006577.2 Human coronavirus HKU1 complete genome  
NC 005831.2 Human coronavirus NL63 complete genome  
NC 005147.1 Human coronavirus OC43 complete genome  
NC 022518.1 Human endogenous retrovirus K113 complete genome  
NC 012950.1 Human enteric coronavirus strain 4408 complete genome  
NC 001612.1 Human enterovirus A complete genome  
NC 001472.1 Human enterovirus B complete genome  
NC 001430.1 Human enterovirus D complete genome  
NC 004295.1 Human erythrovirus V9 complete genome  
NC 001806.1 Human herpesvirus 1 complete genome  
NC 001798.1 Human herpesvirus 2 complete genome  
NC 001348.1 Human herpesvirus 3 complete genome  
NC 007605.1 Human herpesvirus 4 Type 1  
NC 009334.1 Human herpesvirus 4 Type 2  
NC 006273.2 Human herpesvirus 5 strain Merlin complete genome  
NC 001664.2 Human herpesvirus 6A complete genome  
NC 000898.1 Human herpesvirus 6B complete genome  
NC 001716.2 Human herpesvirus 7 complete genome  
NC 009333.1 Human herpesvirus 8 complete genome

|             |                                                |
|-------------|------------------------------------------------|
| NC 001802.1 | Human immunodeficiency virus 1 complete genome |
| NC 001722.1 | Human immunodeficiency virus 2 complete genome |
| NC 004148.2 | Human metapneumovirus complete genome          |
| HPV1REF     | Human papillomavirus 1                         |
| HPV2REF     | Human papillomavirus 2                         |
| HPV3REF     | Human papillomavirus 3                         |
| HPV4REF     | Human papillomavirus 4                         |
| HPV5REF     | Human papillomavirus 5                         |
| HPV6REF     | Human papillomavirus 6                         |
| HPV7REF     | Human papillomavirus 7                         |
| HPV8REF     | Human papillomavirus 8                         |
| HPV9REF     | Human papillomavirus 9                         |
| HPV10REF    | Human papillomavirus 10                        |
| HPV11REF    | Human papillomavirus 11                        |
| HPV12REF    | Human papillomavirus 12                        |
| HPV13REF    | Human papillomavirus 13                        |
| HPV14REF    | Human papillomavirus 14                        |
| HPV15REF    | Human papillomavirus 15                        |
| HPV16REF    | Human papillomavirus 16                        |
| HPV17REF    | Human papillomavirus 17                        |
| HPV18REF    | Human papillomavirus 18                        |
| HPV19REF    | Human papillomavirus 19                        |
| HPV20REF    | Human papillomavirus 20                        |
| HPV21REF    | Human papillomavirus 21                        |
| HPV22REF    | Human papillomavirus 22                        |
| HPV23REF    | Human papillomavirus 23                        |
| HPV24REF    | Human papillomavirus 24                        |
| HPV25REF    | Human papillomavirus 25                        |
| HPV26REF    | Human papillomavirus 26                        |
| HPV27REF    | Human papillomavirus 27                        |

|          |                         |
|----------|-------------------------|
| HPV28REF | Human papillomavirus 28 |
| HPV29REF | Human papillomavirus 29 |
| HPV30REF | Human papillomavirus 30 |
| HPV31REF | Human papillomavirus 31 |
| HPV32REF | Human papillomavirus 32 |
| HPV33REF | Human papillomavirus 33 |
| HPV34REF | Human papillomavirus 34 |
| HPV35REF | Human papillomavirus 35 |
| HPV36REF | Human papillomavirus 36 |
| HPV37REF | Human papillomavirus 37 |
| HPV38REF | Human papillomavirus 38 |
| HPV39REF | Human papillomavirus 39 |
| HPV40REF | Human papillomavirus 40 |
| HPV41REF | Human papillomavirus 41 |
| HPV42REF | Human papillomavirus 42 |
| HPV43REF | Human papillomavirus 43 |
| HPV44REF | Human papillomavirus 44 |
| HPV45REF | Human papillomavirus 45 |
| HPV47REF | Human papillomavirus 47 |
| HPV48REF | Human papillomavirus 48 |
| HPV49REF | Human papillomavirus 49 |
| HPV50REF | Human papillomavirus 50 |
| HPV51REF | Human papillomavirus 51 |
| HPV52REF | Human papillomavirus 52 |
| HPV53REF | Human papillomavirus 53 |
| HPV54REF | Human papillomavirus 54 |
| HPV56REF | Human papillomavirus 56 |
| HPV57REF | Human papillomavirus 57 |
| HPV58REF | Human papillomavirus 58 |
| HPV59REF | Human papillomavirus 59 |

|          |                         |
|----------|-------------------------|
| HPV60REF | Human papillomavirus 60 |
| HPV61REF | Human papillomavirus 61 |
| HPV62REF | Human papillomavirus 62 |
| HPV63REF | Human papillomavirus 63 |
| HPV65REF | Human papillomavirus 65 |
| HPV66REF | Human papillomavirus 66 |
| HPV67REF | Human papillomavirus 67 |
| HPV68REF | Human papillomavirus 68 |
| HPV69REF | Human papillomavirus 69 |
| HPV70REF | Human papillomavirus 70 |
| HPV71REF | Human papillomavirus 71 |
| HPV72REF | Human papillomavirus 72 |
| HPV73REF | Human papillomavirus 73 |
| HPV74REF | Human papillomavirus 74 |
| HPV75REF | Human papillomavirus 75 |
| HPV76REF | Human papillomavirus 76 |
| HPV77REF | Human papillomavirus 77 |
| HPV80REF | Human papillomavirus 80 |
| HPV81REF | Human papillomavirus 81 |
| HPV82REF | Human papillomavirus 82 |
| HPV83REF | Human papillomavirus 83 |
| HPV84REF | Human papillomavirus 84 |
| HPV85REF | Human papillomavirus 85 |
| HPV86REF | Human papillomavirus 86 |
| HPV87REF | Human papillomavirus 87 |
| HPV88REF | Human papillomavirus 88 |
| HPV89REF | Human papillomavirus 89 |
| HPV90REF | Human papillomavirus 90 |
| HPV91REF | Human papillomavirus 91 |
| HPV92REF | Human papillomavirus 92 |

|           |                          |
|-----------|--------------------------|
| HPV93REF  | Human papillomavirus 93  |
| HPV94REF  | Human papillomavirus 94  |
| HPV95REF  | Human papillomavirus 95  |
| HPV96REF  | Human papillomavirus 96  |
| HPV97REF  | Human papillomavirus 97  |
| HPV98REF  | Human papillomavirus 98  |
| HPV99REF  | Human papillomavirus 99  |
| HPV100REF | Human papillomavirus 100 |
| HPV101REF | Human papillomavirus 101 |
| HPV102REF | Human papillomavirus 102 |
| HPV103REF | Human papillomavirus 103 |
| HPV104REF | Human papillomavirus 104 |
| HPV105REF | Human papillomavirus 105 |
| HPV106REF | Human papillomavirus 106 |
| HPV107REF | Human papillomavirus 107 |
| HPV108REF | Human papillomavirus 108 |
| HPV109REF | Human papillomavirus 109 |
| HPV110REF | Human papillomavirus 110 |
| HPV111REF | Human papillomavirus 111 |
| HPV112REF | Human papillomavirus 112 |
| HPV113REF | Human papillomavirus 113 |
| HPV114REF | Human papillomavirus 114 |
| HPV115REF | Human papillomavirus 115 |
| HPV116REF | Human papillomavirus 116 |
| HPV117REF | Human papillomavirus 117 |
| HPV118REF | Human papillomavirus 118 |
| HPV119REF | Human papillomavirus 119 |
| HPV120REF | Human papillomavirus 120 |
| HPV121REF | Human papillomavirus 121 |
| HPV122REF | Human papillomavirus 122 |



HPV123REF Human papillomavirus 123  
HPV124REF Human papillomavirus 124  
HPV125REF Human papillomavirus 125  
HPV126REF Human papillomavirus 126  
HPV127REF Human papillomavirus 127  
HPV128REF Human papillomavirus 128  
HPV129REF Human papillomavirus 129  
HPV130REF Human papillomavirus 130  
HPV131REF Human papillomavirus 131  
HPV132REF Human papillomavirus 132  
HPV133REF Human papillomavirus 133  
HPV134REF Human papillomavirus 134  
HPV135REF Human papillomavirus 135  
HPV136REF Human papillomavirus 136  
HPV137REF Human papillomavirus 137  
HPV138REF Human papillomavirus 138  
HPV139REF Human papillomavirus 139  
HPV140REF Human papillomavirus 140  
HPV141REF Human papillomavirus 141  
HPV142REF Human papillomavirus 142  
HPV143REF Human papillomavirus 143  
HPV144REF Human papillomavirus 144  
HPV145REF Human papillomavirus 145  
HPV146REF Human papillomavirus 146  
HPV147REF Human papillomavirus 147  
HPV148REF Human papillomavirus 148  
HPV149REF Human papillomavirus 149  
HPV150REF Human papillomavirus 150  
HPV151REF Human papillomavirus 151  
HPV153REF Human papillomavirus 153

HPV154REF Human papillomavirus 154  
HPV155REF Human papillomavirus 155  
HPV156REF Human papillomavirus 156  
HPV159REF Human papillomavirus 159  
HPV160REF Human papillomavirus 160  
HPV161REF Human papillomavirus 161  
HPV162REF Human papillomavirus 162  
HPV163REF Human papillomavirus 163  
HPV164REF Human papillomavirus 164  
HPV165REF Human papillomavirus 165  
HPV166REF Human papillomavirus 166  
HPV169REF Human papillomavirus 169  
HPV170REF Human papillomavirus 170  
NC 003461.1 Human parainfluenza virus 1 complete genome  
NC 003443.1 Human parainfluenza virus 2 complete genome  
NC 001796.2 Human parainfluenza virus 3 complete genome  
NC 021928.1 Human parainfluenza virus 4a viral cRNA complete genome strain: M-25  
NC 000883.2 Human parvovirus B19 complete genome  
NC 007026.1 Human picobirnavirus RNA segment 1 complete sequence  
NC 007027.1 Human picobirnavirus RNA segment 2 complete sequence  
NC 001781.1 Human respiratory syncytial virus complete genome  
NC 001490.1 Human rhinovirus 14 complete genome  
NC 001617.1 Human rhinovirus 89 complete genome  
NC 021545.1 Human rotavirus B strain Bang373 inner capsid protein (VP2) gene complete cds  
NC 021544.1 Human rotavirus B strain Bang373 inner capsid protein (VP6) gene complete cds  
NC 021548.1 Human rotavirus B strain Bang373 nonstructural protein (NSP2) gene complete cds  
NC 021547.1 Human rotavirus B strain Bang373 nonstructural protein (NSP3) gene complete cds  
NC 021550.1 Human rotavirus B strain Bang373 nonstructural protein (NSP4) gene complete cds  
NC 021549.1 Human rotavirus B strain Bang373 nonstructural protein (NSP5) gene complete cds

NC 021546.1 Human rotavirus B strain Bang373 nonstructural protein 1-1 (NSP1-1) nonstructural protein 1-2 (NSP1-2) and nonstructural protein 1-3 (NSP1-3) genes complete cds

NC 021543.1 Human rotavirus B strain Bang373 outer capsid protein (VP4) gene complete cds

NC 021542.1 Human rotavirus B strain Bang373 outer capsid protein (VP7) gene complete cds

NC 021541.1 Human rotavirus B strain Bang373 RNA dependent RNA polymerase (VP1) mRNA complete cds

NC 021551.1 Human rotavirus B strain Bang373 VP3 (VP3) mRNA complete cds

NC 001436.1 Human T-lymphotropic virus 1 complete genome

NC 001488.1 Human T-lymphotropic virus 2 complete genome

NC 011800.1 Human T-lymphotropic virus 4 complete genome

NC 018629.1 Ikoma lyssavirus complete genome

NC 009028.2 Ilheus virus complete genome

NC 007357.1 Influenza A virus (A/Goose/Guangdong/1/96(H5N1)) complete genome

NC 007359.1 Influenza A virus (A/Goose/Guangdong/1/96(H5N1)) complete genome

NC 007360.1 Influenza A virus (A/Goose/Guangdong/1/96(H5N1)) complete genome

NC 007364.1 Influenza A virus (A/Goose/Guangdong/1/96(H5N1)) complete genome

NC 007358.1 Influenza A virus (A/Goose/Guangdong/1/96(H5N1)) segment 2 complete sequence

NC 007362.1 Influenza A virus (A/Goose/Guangdong/1/96(H5N1)) segment 4 complete sequence

NC 007361.1 Influenza A virus (A/Goose/Guangdong/1/96(H5N1)) strain A/Goose/Guangdong/1/96(H5N1)

NC 007363.1 Influenza A virus (A/Goose/Guangdong/1/96(H5N1)) strain A/Goose/Guangdong/1/96(H5N1)

NC 004905.2 Influenza A virus (A/Hong Kong/1073/99(H9N2)) complete genome

NC 004910.1 Influenza A virus (A/Hong Kong/1073/99(H9N2)) segment 1 complete sequence

NC 004911.1 Influenza A virus (A/Hong Kong/1073/99(H9N2)) segment 2 complete sequence

NC 004912.1 Influenza A virus (A/Hong Kong/1073/99(H9N2)) segment 3 complete sequence

NC 004908.1 Influenza A virus (A/Hong Kong/1073/99(H9N2)) segment 4 complete sequence

NC 004909.1 Influenza A virus (A/Hong Kong/1073/99(H9N2)) segment 6 complete sequence

NC 004907.1 Influenza A virus (A/Hong Kong/1073/99(H9N2)) segment 7 complete sequence

NC 004906.1 Influenza A virus (A/Hong Kong/1073/99(H9N2)) segment 8 complete sequence

NC 007378.1 Influenza A virus (A/Korea/426/1968(H2N2)) complete genome

NC 007375.1 Influenza A virus (A/Korea/426/68(H2N2)) segment 2 complete sequence

NC 007376.1 Influenza A virus (A/Korea/426/68(H2N2)) segment 3 complete sequence

NC 007374.1 Influenza A virus (A/Korea/426/68(H2N2)) segment 4 complete sequence  
NC 007381.1 Influenza A virus (A/Korea/426/68(H2N2)) segment 5 complete sequence  
NC 007382.1 Influenza A virus (A/Korea/426/68(H2N2)) segment 6 complete sequence  
NC 007377.1 Influenza A virus (A/Korea/426/68(H2N2)) segment 7 complete sequence  
NC 007380.1 Influenza A virus (A/Korea/426/68(H2N2)) segment 8 complete sequence  
NC 007373.1 Influenza A virus (A/New York/392/2004(H3N2)) segment 1 complete sequence  
NC 007372.1 Influenza A virus (A/New York/392/2004(H3N2)) segment 2 complete sequence  
NC 007366.1 Influenza A virus (A/New York/392/2004(H3N2)) segment 4 complete sequence  
NC 007369.1 Influenza A virus (A/New York/392/2004(H3N2)) segment 5 complete sequence  
NC 007368.1 Influenza A virus (A/New York/392/2004(H3N2)) segment 6 complete sequence  
NC 007367.1 Influenza A virus (A/New York/392/2004(H3N2)) segment 7 complete sequence  
NC 007370.1 Influenza A virus (A/New York/392/2004(H3N2)) segment 8 complete sequence  
NC 007371.1 Influenza A virus (A/New York/392/2004(H3N2)) strain A/New York/392/2004  
NC 002023.1 Influenza A virus (A/Puerto Rico/8/34(H1N1)) segment 1 complete sequence  
NC 002021.1 Influenza A virus (A/Puerto Rico/8/34(H1N1)) segment 2 complete sequence  
NC 002022.1 Influenza A virus (A/Puerto Rico/8/34(H1N1)) segment 3 complete sequence  
NC 002017.1 Influenza A virus (A/Puerto Rico/8/34(H1N1)) segment 4 complete sequence  
NC 002019.1 Influenza A virus (A/Puerto Rico/8/34(H1N1)) segment 5 complete sequence  
NC 002018.1 Influenza A virus (A/Puerto Rico/8/34(H1N1)) segment 6 complete sequence  
NC 002016.1 Influenza A virus (A/Puerto Rico/8/34(H1N1)) segment 7 complete sequence  
NC 002020.1 Influenza A virus (A/Puerto Rico/8/34(H1N1)) segment 8 complete sequence  
NC 002207.1 Influenza B virus RNA 4 complete sequence  
NC 002208.1 Influenza B virus RNA 5 complete sequence  
NC 002209.1 Influenza B virus RNA 6 complete sequence  
NC 002210.1 Influenza B virus RNA 7 complete sequence  
NC 002211.1 Influenza B virus RNA 8 complete sequence  
NC 002205.1 Influenza B virus RNA-2 complete sequence  
NC 002206.1 Influenza B virus RNA-3 complete sequence  
NC 006307.1 Influenza C virus (C/Ann Arbor/1/50) segment 1 partial sequence  
NC 006308.1 Influenza C virus (C/Ann Arbor/1/50) segment 2 complete sequence

NC 006309.1 Influenza C virus (C/Ann Arbor/1/50) segment 3 complete sequence  
NC 006310.1 Influenza C virus (C/Ann Arbor/1/50) segment 4 complete sequence  
NC 006311.1 Influenza C virus (C/Ann Arbor/1/50) segment 5 complete sequence  
NC 006312.1 Influenza C virus (C/Ann Arbor/1/50) segment 6 complete sequence  
NC 006306.2 Influenza C virus (C/Ann Arbor/1/50) segment 7 complete genome  
NC 007906.1 Ippy virus segment L complete sequence  
NC 007905.1 Ippy virus segment S complete sequence  
NC 020809.1 Irkut virus complete genome  
NC 007454.1 J-virus complete genome  
NC 001437.1 Japanese encephalitis virus genome  
NC 001699.1 JC polyomavirus complete genome  
NC 005080.1 Junin virus segment L complete genome  
NC 005081.1 Junin virus segment S complete genome  
NC 004210.1 Kadipiro virus chromosome segment 1 complete genome  
NC 004206.1 Kadipiro virus chromosome segment 10 complete genome  
NC 004199.1 Kadipiro virus chromosome segment 12 complete genome  
NC 004212.1 Kadipiro virus chromosome segment 2 complete genome  
NC 004213.1 Kadipiro virus chromosome segment 3 complete genome  
NC 004214.1 Kadipiro virus chromosome segment 4 complete genome  
NC 004215.1 Kadipiro virus chromosome segment 5 complete genome  
NC 004216.1 Kadipiro virus chromosome segment 6 complete genome  
NC 004208.1 Kadipiro virus chromosome segment 8 complete genome  
NC 004207.1 Kadipiro virus chromosome segment 9 complete genome  
NC 004205.1 Kadipiro virus segment 11 complete sequence  
NC 004209.1 Kadipiro virus segment 7 complete genome  
NC 005064.1 Kamiti River virus complete genome  
NC 006947.1 Karshi virus complete genome  
NC 012533.1 Kedougou virus complete genome  
NC 009238.1 KI polyomavirus Stockholm 60 complete genome  
NC 009029.2 Kokobera virus complete genome

NC 004108.1 La Crosse virus segment L complete genome  
NC 004109.1 La Crosse virus segment M complete genome  
NC 004110.1 La Crosse virus segment S complete genome  
NC 020807.1 Lagos bat virus isolate 0406SEN complete genome  
NC 001608.3 Lake Victoria marburgvirus - Musoke complete genome  
NC 003690.1 Langat virus complete genome  
NC 004297.1 Lassa virus segment L complete sequence  
NC 004296.1 Lassa virus segment S complete sequence  
NC 010760.1 Latino virus segment L complete sequence  
NC 010758.1 Latino virus segment S complete sequence  
NC 007736.1 Liao ning virus segment 1 complete genome  
NC 007745.1 Liao ning virus segment 10 complete genome  
NC 007746.1 Liao ning virus segment 11 complete genome  
NC 007747.1 Liao ning virus segment 12 complete genome  
NC 007737.1 Liao ning virus segment 2 complete genome  
NC 007738.1 Liao ning virus segment 3 complete genome  
NC 007739.1 Liao ning virus segment 4 complete genome  
NC 007740.1 Liao ning virus segment 5 complete genome  
NC 007741.1 Liao ning virus segment 6 complete genome  
NC 007742.1 Liao ning virus segment 7 complete genome  
NC 007743.1 Liao ning virus segment 8 complete genome  
NC 007744.1 Liao ning virus segment 9 complete genome  
NC 016144.1 Lloviu virus complete genome  
NC 001809.1 Louping ill virus complete genome  
NC 012777.1 Lujo virus segment L complete genome  
NC 012776.1 Lujo virus segment S complete genome  
NC 016153.1 Luna virus segment L complete genome  
NC 016152.1 Luna virus segment S complete genome  
NC 018711.1 Lunk virus NKS-1 segment L complete genome  
NC 018710.1 Lunk virus NKS-1 segment S complete genome

NC 004291.1 Lymphocytic choriomeningitis virus segment L complete sequence  
NC 004294.1 Lymphocytic choriomeningitis virus segment S complete sequence  
NC 015691.1 Macaca fascicularis papillomavirus type 2 complete genome  
NC 005079.1 Machupo virus segment L complete genome  
NC 005078.1 Machupo virus segment S complete genome  
NC 009489.1 Mapuera virus complete genome  
NC 003417.1 Mayaro virus complete genome  
NC 001498.1 Measles virus complete genome  
NC 007620.1 Menangle virus complete genome  
NC 010277.1 Merkel cell polyomavirus complete genome  
NC 007904.1 Mobala virus segment L complete sequence  
NC 007903.1 Mobala virus segment S complete sequence  
NC 003635.1 Modoc virus complete genome  
NC 006429.1 Mokola virus complete genome  
NC 001501.1 Moloney murine leukemia virus complete genome  
NC 004119.1 Montana myotis leukoencephalitis virus complete genome  
NC 006572.1 Mopeia Lassa reassortant 29 segment L complete genome  
NC 006573.1 Mopeia Lassa reassortant 29 segment S complete genome  
NC 006574.1 Mopeia virus AN20410 segment L complete genome  
NC 006575.1 Mopeia virus AN20410 segment S complete genome  
NC 013058.1 Morogoro virus segment L complete genome  
NC 013057.1 Morogoro virus segment S complete genome  
NC 021069.1 Mosquito flavivirus isolate LSFlaviV-A20-09 complete genome  
NC 005339.1 Mossman virus complete genome  
NC 001503.1 Mouse mammary tumor virus complete genome  
NC 002200.1 Mumps virus complete genome  
NC 001702.1 Murine type C retrovirus complete genome  
NC 000943.1 Murray Valley encephalitis virus complete genome  
NC 017937.1 Nariva virus complete genome  
NC 002617.1 Newcastle disease virus B1 complete genome

NC 002728.1 Nipah virus complete genome  
NC 001959.2 Norwalk virus complete genome  
NC 018705.3 Ntaya virus isolate IPDIA complete genome  
NC 001512.1 O nyong-nyong virus complete genome  
NC 010250.1 Oliveros virus segment L complete sequence  
NC 010248.1 Oliveros virus segment S complete sequence  
NC 005062.1 Omsk hemorrhagic fever virus complete genome  
NC 005776.1 Oropouche virus segment L complete genome  
NC 005775.1 Oropouche virus segment M complete sequence  
NC 005777.1 Oropouche virus segment S complete genome  
NC 006430.1 Parainfluenza virus 5 complete genome  
NC 010761.1 Parana virus segment L complete sequence  
NC 010756.1 Parana virus segment S (small) complete genome  
NC 006383.2 Peste-des-petits-ruminants virus complete genome  
NC 006447.1 Pichinde virus complete genome  
NC 006439.1 Pichinde virus L RNA complete genome  
NC 005897.1 Pirital virus segment L complete genome  
NC 005894.1 Pirital virus segment S complete sequence  
NC 006579.1 Pneumonia virus of mice J3666 complete genome  
NC 002058.3 Poliovirus complete genome  
NC 000940.1 Porcine enteric sapovirus complete genome  
NC 009640.1 Porcine rubulavirus complete genome  
NC 003687.1 Powassan virus complete genome  
NC 005225.1 Puumala virus segment L complete genome  
NC 005223.1 Puumala virus segment M complete sequence  
NC 005224.1 Puumala virus segment S complete sequence  
NC 012671.1 Quang Binh virus complete genome  
NC 001542.1 Rabies virus complete genome  
NC 001819.1 Rauscher murine leukemia virus complete genome  
NC 022630.1 Razdan virus strain LEIV-Arm2741 segment L complete sequence



NC 022631.1 Razdan virus strain LEIV-Arm2741 segment M complete sequence  
NC 022632.1 Razdan virus strain LEIV-Arm2741 segment S complete sequence  
NC 001803.1 Respiratory syncytial virus complete genome  
NC 004161.1 Reston ebolavirus complete genome  
NC 014397.1 Rift Valley fever virus segment L complete genome  
NC 014396.1 Rift Valley fever virus segment M complete genome  
NC 014395.1 Rift Valley fever virus segment S complete genome  
NC 006296.2 Rinderpest virus (strain Kabete O) complete genome  
NC 003675.1 Rio Bravo virus genome  
NC 021153.1 Rodent hepacivirus isolate RHV-339 complete genome  
NC 001544.1 Ross River virus complete genome  
NC 011507.2 Rotavirus A segment 1 complete genome  
NC 011504.2 Rotavirus A segment 10 complete genome  
NC 011505.2 Rotavirus A segment 11 complete genome  
NC 011506.2 Rotavirus A segment 2 complete genome  
NC 011508.2 Rotavirus A segment 3 complete genome  
NC 011510.2 Rotavirus A segment 4 complete genome  
NC 011500.2 Rotavirus A segment 5 complete genome  
NC 011509.2 Rotavirus A segment 6 complete genome  
NC 011501.2 Rotavirus A segment 7 complete genome  
NC 011502.2 Rotavirus A segment 8 complete genome  
NC 011503.2 Rotavirus A segment 9 complete genome  
NC 007547.1 Rotavirus C segment 1 complete sequence  
NC 007569.1 Rotavirus C segment 10 complete sequence  
NC 007573.1 Rotavirus C segment 11 complete sequence  
NC 007546.1 Rotavirus C segment 2 complete sequence  
NC 007572.1 Rotavirus C segment 3 complete sequence  
NC 007574.1 Rotavirus C segment 4 complete sequence  
NC 007570.1 Rotavirus C segment 5 complete sequence  
NC 007543.1 Rotavirus C segment 6 complete sequence

NC 007544.1 Rotavirus C segment 7 complete sequence  
NC 007571.1 Rotavirus C segment 8 complete sequence  
NC 007545.1 Rotavirus C segment 9 complete sequence  
NC 021625.1 Rotavirus F chicken/03V0568/DEU/2003 segment 1 complete sequence  
NC 021629.1 Rotavirus F chicken/03V0568/DEU/2003 segment 10 complete sequence  
NC 021634.1 Rotavirus F chicken/03V0568/DEU/2003 segment 11 complete sequence  
NC 021626.1 Rotavirus F chicken/03V0568/DEU/2003 segment 2 complete sequence  
NC 021631.1 Rotavirus F chicken/03V0568/DEU/2003 segment 3 complete sequence  
NC 021630.1 Rotavirus F chicken/03V0568/DEU/2003 segment 4 complete sequence  
NC 021632.1 Rotavirus F chicken/03V0568/DEU/2003 segment 5 complete sequence  
NC 021635.1 Rotavirus F chicken/03V0568/DEU/2003 segment 6 complete sequence  
NC 021633.1 Rotavirus F chicken/03V0568/DEU/2003 segment 7 complete sequence  
NC 021628.1 Rotavirus F chicken/03V0568/DEU/2003 segment 8 complete sequence  
NC 021627.1 Rotavirus F chicken/03V0568/DEU/2003 segment 9 complete sequence  
NC 021590.1 Rotavirus G chicken/03V0567/DEU/2003 segment 1 complete sequence  
NC 021586.1 Rotavirus G chicken/03V0567/DEU/2003 segment 10 complete sequence  
NC 021587.1 Rotavirus G chicken/03V0567/DEU/2003 segment 11 complete sequence  
NC 021580.1 Rotavirus G chicken/03V0567/DEU/2003 segment 2 complete sequence  
NC 021581.1 Rotavirus G chicken/03V0567/DEU/2003 segment 3 complete sequence  
NC 021589.1 Rotavirus G chicken/03V0567/DEU/2003 segment 4 complete sequence  
NC 021583.1 Rotavirus G chicken/03V0567/DEU/2003 segment 5 complete sequence  
NC 021588.1 Rotavirus G chicken/03V0567/DEU/2003 segment 6 complete sequence  
NC 021585.1 Rotavirus G chicken/03V0567/DEU/2003 segment 7 complete sequence  
NC 021584.1 Rotavirus G chicken/03V0567/DEU/2003 segment 8 complete sequence  
NC 021582.1 Rotavirus G chicken/03V0567/DEU/2003 segment 9 complete sequence  
NC 001545.2 Rubella virus complete genome  
NC 006317.1 Sabia virus complete genome  
NC 006313.1 Sabia virus segment L complete genome  
NC 015412.1 Sandfly Sicilian Turkey virus segment L complete genome  
NC 015411.1 Sandfly Sicilian Turkey virus segment M complete genome

NC 015413.1 Sandfly Sicilian Turkey virus segment S complete genome  
NC 006554.1 Sapovirus C12 strain C12  
NC 006269.1 Sapovirus Hu/Dresden/pJG-Sap01/DE complete genome  
NC 010624.1 Sapovirus Mc10 complete genome  
NC 004718.3 SARS coronavirus complete genome  
NC 018466.1 Sathuperi virus Gn-Gc-NSm gene for M polyprotein segment M genomic RNA  
NC 018462.1 Sathuperi virus N and NSs genes segment S genomic RNA  
NC 018461.1 Sathuperi virus RdRp gene for RNA-dependent RNA polymerase segment L genomic RNA  
NC 015212.1 Seal anellovirus TFFN/USA/2006 complete genome  
NC 001552.1 Sendai virus complete genome  
NC 005237.1 Seoul virus segment M complete sequence  
NC 005236.1 Seoul virus strain 80-39 segment S complete sequence  
NC 005238.1 Seoul virus strain Seoul 80-39 clone 1  
NC 008719.1 Sepik virus complete genome  
NC 018136.1 SFTS virus HB29 segment L complete genome  
NC 018138.1 SFTS virus HB29 segment M complete genome  
NC 018137.1 SFTS virus HB29 segment S complete genome  
NC 018467.1 Shamonda virus Gn-Gc-NSm gene for M polyprotein segment M genomic RNA isolate Ib An 5550  
NC 018464.1 Shamonda virus N and NSs genes segment S genomic RNA isolate Ib An 5550  
NC 018463.1 Shamonda virus RdRp gene for RNA-dependent RNA polymerase segment L genomic RNA isolate Ib An 5550  
NC 018478.1 Simbu virus Gn-Gc-NSm gene for M polyprotein segment M genomic RNA isolate SA Ar 53  
NC 018477.1 Simbu virus N and NSs genes segment S genomic RNA isolate SA Ar 53  
NC 018476.1 Simbu virus RdRp gene for RNA-dependent RNA polymerase segment L genomic RNA isolate SA Ar 53  
NC 001669.1 Simian virus 40 complete genome  
NC 006428.1 Simian virus 41 complete genome  
NC 005217.1 Sin Nombre virus segment L complete sequence  
NC 005215.1 Sin Nombre virus segment M complete sequence  
NC 005216.1 Sin Nombre virus segment S complete sequence  
NC 007013.1 Small anellovirus 1 complete genome  
NC 007014.1 Small anellovirus 2 complete genome

NC 007580.2 St. Louis encephalitis virus complete genome  
NC 006432.1 Sudan ebolavirus complete genome  
NC 004292.1 Tacaribe virus segment L complete sequence  
NC 004293.1 Tacaribe virus segment S complete sequence  
NC 003996.1 Tamana bat virus genome  
NC 010702.1 Tamiami virus segment L complete sequence  
NC 010701.1 Tamiami virus segment S (small) complete genome  
NC 015843.2 Tembusu virus strain JS804 complete genome  
NC 006495.1 Thogoto virus  
NC 006496.1 Thogoto virus  
NC 006506.1 Thogoto virus complete genome  
NC 006508.1 Thogoto virus segment 1 complete genome  
NC 006507.1 Thogoto virus segment 5 complete genome  
NC 006504.1 Thogoto virus segment 6 complete genome  
NC 010707.1 Thottapalayam virus segment L complete sequence  
NC 010708.1 Thottapalayam virus segment M complete sequence  
NC 010704.1 Thottapalayam virus segment S complete sequence  
NC 001672.1 Tick-borne encephalitis virus complete genome  
NC 004074.1 Tioman virus complete genome  
NC 014071.1 Torque teno canis virus complete genome  
NC 014087.1 Torque teno douroucouli virus complete genome  
NC 014072.1 Torque teno felis virus complete genome  
NC 009225.1 Torque teno midi virus 1 complete genome  
NC 014093.1 Torque teno midi virus 2 complete genome  
NC 014097.1 Torque teno mini virus 1 complete genome  
NC 014086.1 Torque teno mini virus 2 complete genome  
NC 014088.1 Torque teno mini virus 3 complete genome  
NC 014090.1 Torque teno mini virus 4 complete genome  
NC 014089.1 Torque teno mini virus 5 complete genome  
NC 014095.1 Torque teno mini virus 6 complete genome

NC 014082.1 Torque teno mini virus 7 complete genome  
NC 014068.1 Torque teno mini virus 8 complete genome  
NC 002195.1 Torque teno mini virus 9 complete genome  
NC 014070.1 Torque teno sus virus 1 complete genome  
NC 014092.2 Torque teno sus virus k2 isolate 2p complete genome  
NC 014085.1 Torque teno tamarin virus complete genome  
NC 015783.1 Torque teno virus complete genome  
NC 002076.2 Torque teno virus 1 complete genome  
NC 014076.1 Torque teno virus 10 complete genome  
NC 014075.1 Torque teno virus 12 complete genome  
NC 014077.1 Torque teno virus 14 complete genome  
NC 014096.1 Torque teno virus 15 complete genome  
NC 014091.1 Torque teno virus 16 complete genome  
NC 014078.1 Torque teno virus 19 complete genome  
NC 014480.2 Torque teno virus 2 complete genome  
NC 014083.1 Torque teno virus 25 complete genome  
NC 014079.1 Torque teno virus 26 complete genome  
NC 014074.1 Torque teno virus 27 complete genome  
NC 014073.1 Torque teno virus 28 complete genome  
NC 014081.1 Torque teno virus 3 complete genome  
NC 014069.1 Torque teno virus 4 complete genome  
NC 014094.1 Torque teno virus 6 complete genome  
NC 014080.1 Torque teno virus 7 complete genome  
NC 014084.1 Torque teno virus 8 complete genome  
NC 006319.1 Toscana virus segment L complete sequence  
NC 006320.1 Toscana virus segment M complete sequence  
NC 006318.1 Toscana virus segment S complete sequence  
NC 020498.1 TTV-like mini virus isolate TTMV LY1 complete genome  
NC 005226.1 Tula virus segment L complete sequence  
NC 005228.1 Tula virus segment M complete sequence

NC 005227.2 Tula virus segment S complete genome  
NC 002199.1 Tupaia paramyxovirus complete genome  
NC 006551.1 Usutu virus complete genome  
NC 005221.1 Uukuniemi virus complete genome  
NC 005220.1 Uukuniemi virus chromosome segment M complete genome  
NC 005214.1 Uukuniemi virus segment L complete sequence  
NC 006998.1 Vaccinia virus complete genome  
NC 001611.1 Variola virus complete genome  
NC 001560.1 Vesicular stomatitis Indiana virus complete genome  
NC 012735.1 Wesselsbron virus complete genome  
NC 001563.2 West Nile virus complete genome  
NC 009942.1 West Nile virus complete genome  
NC 010703.1 Whitewater Arroyo virus segment L complete sequence  
NC 010700.1 Whitewater Arroyo virus segment S complete sequence  
NC 009539.1 WU Polyomavirus complete genome  
NC 002031.1 Yellow fever virus complete genome  
NC 005039.1 Yokose virus complete genome  
NC 012532.1 Zika virus complete genome  
AF221065 MuLV\_DG75  
MuLV\_JV  
U13766 MuLV\_MCF1233  
HQ246218 MuLV\_N417  
DQ399707 XMRV\_VP62

**Table S3.** Quantification of HPV-18 genes in NPC cell lines

| Gene Name | Hela-1 (%)  | Hela-2 (%)   | CNE1 (%)   | CNE1-JPN (%) | HONE1 (%)   |
|-----------|-------------|--------------|------------|--------------|-------------|
| E1        | 186.1 (15%) | 1058.5 (30%) | 34.4 (16%) | 167.8 (22%)  | 164.6 (21%) |
| E2        | 1.3 (0%)    | 3.5 (0%)     | 3.1 (1%)   | 9.1 (1%)     | 11.2 (2%)   |
| E4        | 0.0 (0%)    | 0.0 (0%)     | 0.0 (0%)   | 0.0 (0%)     | 0.0 (0%)    |
| E5        | 0.0 (0%)    | 0.0 (0%)     | 0.0 (0%)   | 0.0 (0%)     | 0.0 (0%)    |
| E6        | 294.8 (25%) | 628.3 (18%)  | 48.5 (22%) | 167.5 (21%)  | 181.3 (23%) |
| E7        | 658.4 (55%) | 1798.5 (51%) | 96.0 (43%) | 393.9 (51%)  | 403.3 (52%) |
| L1        | 56.6 (5%)   | 14.9 (1%)    | 39.4 (18%) | 37.5 (5%)    | 18.0 (2%)   |
| L2        | 0.0 (0%)    | 0.0 (0%)     | 0.0 (0%)   | 0.0 (0%)     | 0.0 (0%)    |

Gene expression represented as Transcripts per Million (TPM)
